# Supplementary material for: Comparative analysis of latex transcriptomes reveals the potential mechanisms underlying rubber molecular weight variations between the Hevea brasiliensis clones RRIM600 and Reyan7-33–97
Source: BMC Plant Biol. 2021 May 29;21:244. doi: 10.1186/s12870-021-03022-5 (PMC8164328; doi:10.1186/s12870-021-03022-5)
Supplement: Supplementary file 1 — Table S1. Sequencing statistical summary of latex transcriptomes. [file 12870_2021_3022_MOESM1_ESM.xlsx]

## Sheet: Table S1
Comparative analysis of latex transcriptomes reveals the potential mechanisms underlying the rubber molecular weight variations among Hevea brasiliensis clones RRIM600 and Reyan7-33-97 Shichao Xin, Yuwei Hua, Ji Li, Xuemei Dai, Xianfeng Yang, Jinu Udayabhanu, Huasun Huang* and Tiandai Huang*
Table S1. Sequencing statistical summary of latex transcriptomes.
sample	raw_reads	clean_reads	clean_bases	error_rate(%)	Q20 (%)	Q30 (%)	GC (%)	Total mapping	Unique match
L73397_y1_1	46322066	45446472	6.82G	0.03	96.19	90.09	43.76	43168605(94.99%)	40730265(89.62%)
L73397_y1_2	43094312	41756214	6.26G	0.02	98.33	94.77	43.78	40300424(96.51%)	38036984(91.09%)
L73397_y1_3	43320352	41853766	6.28G	0.02	98.29	94.64	43.84	40062670(95.72%)	37838284(90.41%)
L600_y1_1	44338652	42044256	6.31G	0.02	98.33	94.82	44.08	40390546(96.07%)	38273332(91.03%)
L600_y1_2	45650082	43965548	6.59G	0.02	98.32	94.72	43.93	42070960(95.69%)	39557462(89.97%)
L600_y1_3	48244194	46062146	6.91G	0.02	98.33	94.89	44.03	44225841(96.01%)	41717947(90.57%)
L73397_y30_1	42202832	40805560	6.12G	0.02	98.34	94.77	43.96	39154998(95.96%)	36770310(90.11%)
L73397_y30_2	45075082	43784208	6.57G	0.02	98.38	94.88	43.99	41893176(95.68%)	39218048(89.57%)
L73397_y30_3	43694068	42376516	6.36G	0.02	98.39	94.84	43.89	40742925(96.15%)	38453742(90.74%)
L600_y30_1	42387704	40974422	6.15G	0.03	97.75	93.27	43.83	39142867(95.53%)	36861562(89.96%)
L600_y30_2	42992350	41032602	6.15G	0.02	98.33	94.76	44.16	39473619(96.2%)	37421122(91.2%)
L600_y30_3	47668706	45843934	6.88G	0.02	98.27	94.51	43.62	43977921(95.93%)	41517148(90.56%)
Three biological replicates of latex from 1 and 30 years old trees of H. brasiliensis clones Reyan7-33-97 and RRIM600; Clean reads: number of reads after removing low-quality reads and trimming adapter sequences;
Clean bases: number of clean reads multiplied by length of clean reads; Q30: Phred score, indicates 99% and 99.9% accuracy of sequenced bases; GC content: percentage of G and C in total bases.
