# Supplementary material for: Comparative analysis of latex transcriptomes reveals the potential mechanisms underlying rubber molecular weight variations between the Hevea brasiliensis clones RRIM600 and Reyan7-33–97
Source: BMC Plant Biol. 2021 May 29;21:244. doi: 10.1186/s12870-021-03022-5 (PMC8164328; doi:10.1186/s12870-021-03022-5)
Supplement: Supplementary file 2 — Table S2. Expression levels (FPKM) of rubber biosynthetic genes in four H. brasiliensis latex samples. [file 12870_2021_3022_MOESM2_ESM.xlsx]

## Sheet: Table S2
Comparative analysis of latex transcriptomes reveals the potential mechanisms underlying the rubber molecular weight variations among Hevea brasiliensis clones RRIM600 and Reyan7-33-97 Shichao Xin, Yuwei Hua, Ji Li, Xuemei Dai, Xianfeng Yang, Jinu Udayabhanu, Huasun Huang* and Tiandai Huang*
Table S2. Expression levels (fragments per kilobase per million fragments, FPKM) of rubber biosynthetic genes in four H. brasiliensis latex samples.
	Item	Gene Name	Gene ID	FPKM in four latex samples
				Reyan73397y1	RRIM600y1	Reyan73397y30	RRIM600y30
MVA pathway	1	ACAT1	LOC110641512	507.33	429.923	26.1274	596.398
	2	ACAT2	LOC110631422	1.62277	1.01018	2.32193	1.15137
	3	ACAT3	LOC110637243	10.1894	9.25894	8.61312	9.88376
	4	ACAT4	LOC110647342	215.532	193.112	80.5583	530.253
	5	HMGS1	LOC110645064	278.144	155.15	15.8515	58.0569
	6	HMGS2	LOC110654798	1154.42	1131.39	73.5568	1458.36
	7	HMGR1	LOC110666401	0	0.0153705	0.489394	0
	8	HMGR2	LOC110669274	984.038	752.567	116.761	953.372
	9	HMGR3	LOC110639682	80.2282	57.7175	2.99986	189.919
	10	HMGR4	LOC110632308	10.4237	2.57086	7.26772	3.36683
	11	HMGR5	LOC110659189	0.941051	2.33468	0.361518	5.35495
	12	MVK1	LOC110667490	8.62486	10.7916	24.7461	77.3427
	13	MVK2	LOC110660320	23.3607	32.4772	4.29681	36.7912
	14	MVK3	LOC110660269	14.3131	7.5528	5.49518	15.2778
	15	MVD1	LOC110643993	14.2447	10.8606	13.2594	31.912
	16	MVD2	LOC110643326	125.128	70.3162	37.9269	71.6362
	17	PMD1	LOC110653025	10.4097	10.1249	6.228	8.35234
	18	PMD2	LOC110634581	54.9821	39.2715	14.7998	153.496
MEP pathway	19	DXS1	LOC110631942	0.250619	0.236137	0.113373	0.0293671
	20	DXS2	LOC110637902	0	0	0	0
	21	DXS3	LOC110637308	6.9336	9.26903	3.31281	7.87237
	22	DXS4	LOC110670942	0.271773	0.0144193	0.0617783	0.12451
	23	DXS5	LOC110658845	0	0	0.0110632	0
	24	DXS6	LOC110655489	15.1093	16.0357	2.21481	38.6701
	25	DXS7	LOC110654072	20.5459	23.7857	16.2099	32.9484
	26	DXS8	LOC110632596	0.0337767	0.0481462	0	0.0400392
	27	DXS9	LOC110654429	0.0201926	0	0.0971357	0.0306186
	28	DXS10	LOC110632700	4.27393	4.73538	12.4031	17.963
	29	DXR1	LOC110657095	7.25635	19.3525	4.82985	26.3117
	30	DXR2	LOC110643412	1.6051	0.770585	0.189203	1.00396
	31	CMS1	LOC110637977	3.94682	2.40973	3.8095	1.88436
	32	CMS2	LOC110664624	1.48691	1.85712	1.11557	1.15471
	33	CMK1	LOC110662704	0.211914	0.439498	0.741586	1.2973
	34	CMK2	LOC110653318	0.442739	0.913316	0.997585	1.17874
	35	MCS1	LOC110658471	3.67158	7.9406	9.62242	7.43655
	36	MCS2	LOC110656119	3.58647	3.86553	16.2721	7.03398
	37	HDS1	LOC110631634	4.40574	3.28633	2.00367	4.51744
	38	HDS2	LOC110647537	6.17664	7.97856	2.73414	11.2069
	39	HDR1	LOC110635808	24.7911	35.7268	28.9619	45.4061
	40	HDR2	LOC110665086	3.36026	7.03158	2.67146	5.18967
Initiator synthesis	41	IPPI1	LOC110659904	6.14204	9.37574	9.72617	10.0501
	42	IPPI2	LOC110639102	2.2987	1.59908	0.0259957	0
	43	GPPS1	LOC110661947	25.0869	18.5396	24.479	40.5579
	44	GPPS2	LOC110661939	41.2694	33.3254	44.5874	66.4077
	45	GPPS3	LOC110661938	30.3558	25.5833	32.4952	40.5672
	46	GPPS4	LOC110645753	10.0715	12.7418	18.782	13.3119
	47	GPPS5	LOC110673468	0	0	0	0
	48	FPS1	LOC110639874	0.0700493	0.277846	0.652846	0.220848
	49	FPS2	LOC110658887	106.777	89.76	42.3279	90.3979
	50	FPS3	LOC110669040	22.4851	29.1238	12.1745	31.2389
	51	GGPS1	LOC110671388	0	0	0.384793	0.0260426
	52	GGPS2	LOC110635586	0	0	0.119481	0
	53	GGPS3	LOC110640098	59.5623	85.608	20.7664	76.4773
	54	GGPS4	LOC110669986	0.221238	0.189835	1.45365	0.226539
	55	GGPS5	LOC110657487	17.5938	33.6729	22.2086	40.8415
Rubber elongation	56	CPT1	LOC110651635	0	0.0444157	0	0
	57	CPT2	LOC110638730	0.0335769	0.0249543	0	0.0119394
	58	CPT3	LOC110636608	0.309647	0.0799691	0.209563	0.302732
	59	CPT4	LOC110638376	0.141446	0.0446997	0.301629	0.214174
	60	CPT5	LOC110638719	0.0936631	0.0407952	0.0293626	0.0220449
	61	CPT6	LOC110667932	117.006	189.409	3.6011	205.854
	62	CPT7	LOC110647596	211.791	339.237	75.1368	408.217
	63	CPT8	LOC110667933	235.273	107.128	42.1584	978.056
	64	CPT9	LOC110650495	0.535638	4.41008	0	0.719764
	65	CPT10	LOC110649413	0	0	0	0
	66	CPT11	LOC110668032	2.40675	6.01634	0	1.24691
	67	REF1	LOC110644928	30026.2	41987.1	50832.7	49255.6
	68	REF2	LOC110644929	1.49102	1.6593	9.424	7.10522
	69	REF3	LOC110644926	1935.17	2618	4300.29	5227.23
	70	REF4	LOC110644927	99.0467	375.365	541.478	591.673
	71	REF5	LOC110644913	382.182	397.512	72.8129	540.206
	72	REF6	LOC110637984	0.620399	1.32087	0	0.0697571
	73	REF7	LOC110644930	7081.14	6697.15	7606.77	9611.4
	74	REF8	LOC110644923	585.77	859.782	211.209	1176.14
	75	SRPP1	LOC110644925	7254.31	8075.52	9512.47	17412.8
	76	SRPP2	LOC110651232	199.263	231.845	421.606	554.052
	77	SRPP3	LOC110644932	0	0.0287731	0.0656752	0.272458
	78	SRPP4	LOC110660936	0.159074	0.0286042	0.338878	0.0621126
	79	SRPP5	LOC110644912	926.283	2077.68	31.8383	43.9783
	80	SRPP6	LOC110638145	7.40748	1.86054	4.45672	3.37807
	81	SRPP7	LOC110640108	7.94323	7.8429	7.00904	10.281
	82	SRPP8	LOC110644922	183.372	323.335	4.47284	49.6368
	83	SRPP9	LOC110644920	1199.87	3131.47	8.1622	43.0511
	84	SRPP10	LOC110632980	0.228053	0.369294	0.177629	0.113461
	85	CPTL	LOC110649060	914.975	813.705	173.052	1696.84
