# Supplementary material for: Comparative analysis of latex transcriptomes reveals the potential mechanisms underlying rubber molecular weight variations between the Hevea brasiliensis clones RRIM600 and Reyan7-33–97
Source: BMC Plant Biol. 2021 May 29;21:244. doi: 10.1186/s12870-021-03022-5 (PMC8164328; doi:10.1186/s12870-021-03022-5)
Supplement: Supplementary file 3 — Table S3. The differentially enriched gene sets related to isoprenoid pathways among latex samples. [file 12870_2021_3022_MOESM3_ESM.xlsx]

## Sheet: Table S3
Comparative analysis of latex transcriptomes reveals the potential mechanisms underlying the rubber molecular weight variations among Hevea brasiliensis clones RRIM600 and Reyan7-33-97 Shichao Xin, Yuwei Hua, Ji Li, Xuemei Dai, Xianfeng Yang, Jinu Udayabhanu, Huasun Huang* and Tiandai Huang*
Table S3. The differentially enriched gene sets related to isoprenoid pathways among latex samples.
	Enriched gene sets	Enrichment score	p-value
In Reyan73397y1 compared with Reyan73397y30	Sesquiterpenoid and triterpenoid biosynthesis(pop00909)	-0.645818	0
	Zeatin biosynthesis(pop00908)	-0.525656	0
	Steroid biosynthesis(pop00100)	-0.67996	0
	Various types of n-glycan biosynthesis(pop00513)	-0.65074	0
	N-glycan biosynthesis(pop00510)	-0.510247	0
	Terpenoid backbone biosynthesis(pop00900)	-0.380261	0.1754
In RRIM600y1 compared with RRIM600y30	Diterpenoid biosynthesis(pop00904)	-0.556982	0
	Various types of n-glycan biosynthesis(pop00513)	-0.517101	0
	N-glycan biosynthesis(pop00510)	-0.369106	0.0989
	Ubiquinone and other terpenoid-quinone biosynthesis(pop00130)	-0.403945	0.1684
	Steroid biosynthesis(pop00100)	-0.43271	0.0871
In Reyan73397y1 compared with RRIM600y1	Carotenoid biosynthesis(pop00906)	-0.534982	0
	Zeatin biosynthesis(pop00908)	-0.572403	0.1023
	Ubiquinone and other terpenoid-quinone biosynthesis(pop00130)	-0.5519	0.1027
	Diterpenoid biosynthesis(pop00904)	-0.572436	0
In RRIM600y1 compared with Reyan73397y1	N-glycan biosynthesis(pop00510)	0.388004	0.101
	Terpenoid backbone biosynthesis(pop00900)	0.375652	0.2989
In Reyan73397y30 compared with RRIM600y30	Ubiquinone and other terpenoid-quinone biosynthesis(pop00130)	-0.494175	0
In RRIM600y30 compared with Reyan73397y30	Pyruvate metabolism(pop00620)	0.545203	0
	Sesquiterpenoid and triterpenoid biosynthesis(pop00909)	0.688495	0
	Glycolysis/gluconeogenesis(pop00010)	0.453536	0
	Terpenoid backbone biosynthesis(pop00900)	0.54449	0
	Zeatin biosynthesis(pop00908)	0.498912	0
	Various types of n-glycan biosynthesis(pop00513)	0.633745	0
	N-glycan biosynthesis(pop00510)	0.57142	0.1124
	Steroid biosynthesis(pop00100)	0.610568	0
