# Supplementary material for: Comparative analysis of latex transcriptomes reveals the potential mechanisms underlying rubber molecular weight variations between the Hevea brasiliensis clones RRIM600 and Reyan7-33–97
Source: BMC Plant Biol. 2021 May 29;21:244. doi: 10.1186/s12870-021-03022-5 (PMC8164328; doi:10.1186/s12870-021-03022-5)
Supplement: Supplementary file 4 — Table S4. Expression levels (FPKM) of differentially expressed non-rubber isoprenoid pathway genes in four H. brasiliensis latex samples. [file 12870_2021_3022_MOESM4_ESM.xlsx]

## Sheet: Table S4
Comparative analysis of latex transcriptomes reveals the potential mechanisms underlying the rubber molecular weight variations among Hevea brasiliensis clones RRIM600 and Reyan7-33-97 Shichao Xin, Yuwei Hua, Ji Li, Xuemei Dai, Xianfeng Yang, Jinu Udayabhanu, Huasun Huang* and Tiandai Huang*
Table S4. Expression levels (fragments per kilobase per million fragments, FPKM) of differentially expressed non-rubber isoprenoid pathway genes in four H. brasiliensis latex samples.
pathways	gene_id	Reyan73397y1	RRIM600y1	Reyan73397y30	RRIM600y30	Functioanl annotation
Steroid biosynthesis (pop00100)	LOC110644111	314.81	183.42	11.4612	103.348	squalene synthase-like%2C transcript variant X1 && P53800.1 RecName: Full=Squalene synthase; Short=SQS; Short=SS; AltName: Full=FPP:FPP farnesyltransferase; AltName: Full=Farnesyl-diphosphate farnesyltransferase && PF00494:Squalene/phytoene synthase
	LOC110664907	114.135	99.855	83.9306	251.966	sterol 14-demethylase%2C transcript variant X1 && Q9SAA9.1 RecName: Full=Sterol 14-demethylase; AltName: Full=Cytochrome P450 51A2; AltName: Full=Cytochrome P450 51G1; Short=AtCYP51; AltName: Full=Obtusifoliol 14-demethylase; AltName: Full=Protein EMBRYO DEFECTIVE 1738 && PF00067:Cytochrome P450
	LOC110661032	106.743	157.073	81.026	140.548	24-methylenesterol C-methyltransferase 2-like && Q39227.2 RecName: Full=24-methylenesterol C-methyltransferase 2; Short=24-sterol C-methyltransferase 2; Short=Sterol-C-methyltransferase 2; AltName: Full=Protein COTYLEDON VASCULAR PATTERN 1 && PF08498:Sterol methyltransferase C-terminal|PF08241:Methyltransferase domain
	LOC110639361	63.2635	50.694	13.5814	128.361	triacylglycerol lipase SDP1-like%2C transcript variant X3 && Q9LZA6.1 RecName: Full=Triacylglycerol lipase SDP1; AltName: Full=Protein SUGAR-DEPENDENT 1 && PF01734:Patatin-like phospholipase|PF11815:Domain of unknown function (DUF3336)
	LOC110645323	57.5005	74.0564	2.15821	43.5489	methylsterol monooxygenase 1-1-like && Q8L7W5.1 RecName: Full=Methylsterol monooxygenase 1-1; AltName: Full=Sterol 4-alpha-methyl-oxidase 1-1; Short=AtSMO1-1 && PF04116:Fatty acid hydroxylase superfamily
	LOC110644392	33.118	27.7511	41.7915	57.8381	methylsterol monooxygenase 2-2-like%2C transcript variant X1 && Q8VWZ8.1 RecName: Full=Methylsterol monooxygenase 2-2; AltName: Full=Sterol 4-alpha-methyl-oxidase 1; Short=AtSMO1; AltName: Full=Sterol 4-alpha-methyl-oxidase 2-2 && PF04116:Fatty acid hydroxylase superfamily
	LOC110649201	44.6106	97.6606	1.9637	7.01365	delta(24)-sterol reductase%2C transcript variant X1 && P93472.1 RecName: Full=Delta(24)-sterol reductase; AltName: Full=Cell elongation protein diminuto && PF01565:FAD binding domain
	LOC110646492	28.5755	32.9561	15.8766	43.629	squalene synthase-like && P53800.1 RecName: Full=Squalene synthase; Short=SQS; Short=SS; AltName: Full=FPP:FPP farnesyltransferase; AltName: Full=Farnesyl-diphosphate farnesyltransferase && PF00494:Squalene/phytoene synthase
	LOC110634256	53.5525	31.1828	14.7457	21.4268	cycloartenol-C-24-methyltransferase-like && Q9LM02.1 RecName: Full=Cycloartenol-C-24-methyltransferase; AltName: Full=24-sterol C-methyltransferase 1; Short=Sterol C-methyltransferase 1; AltName: Full=Protein CEPHALOPOD; AltName: Full=Protein STEROL METHYLTRANSFERASE 1 && PF08498:Sterol methyltransferase C-terminal|PF08241:Methyltransferase domain
	LOC110669811	24.3076	36.5629	3.84799	40.1993	squalene monooxygenase-like && O48651.1 RecName: Full=Squalene monooxygenase; AltName: Full=Squalene epoxidase; Short=SE && PF08491:Squalene epoxidase
	LOC110658049	39.988	35.443	2.37391	19.4372	methylsterol monooxygenase 1-1-like%2C transcript variant X1 && Q8L7W5.1 RecName: Full=Methylsterol monooxygenase 1-1; AltName: Full=Sterol 4-alpha-methyl-oxidase 1-1; Short=AtSMO1-1 && PF04116:Fatty acid hydroxylase superfamily
	LOC110639722	24.676	27.9436	12.3811	19.3689	cycloartenol synthase%2C transcript variant X1 && Q2XPU6.1 RecName: Full=Cycloartenol synthase; Short=RcCAS && PF13243:Squalene-hopene cyclase C-terminal domain|PF13249:Squalene-hopene cyclase N-terminal domain
	LOC110637842	16.0032	13.519	12.6553	35.9392	delta(7)-sterol-C5(6)-desaturase-like && Q9ZT29.1 RecName: Full=Delta(7)-sterol-C5(6)-desaturase; AltName: Full=Delta(7)-sterol-C5-desaturase; AltName: Full=Delta-7-C-5 sterol desaturase && PF04116:Fatty acid hydroxylase superfamily
	LOC110659984	53.3307	0.72786	21.1369	0.726903	cycloartenol-C-24-methyltransferase-like%2C transcript variant X4 && Q9LM02.1 RecName: Full=Cycloartenol-C-24-methyltransferase; AltName: Full=24-sterol C-methyltransferase 1; Short=Sterol C-methyltransferase 1; AltName: Full=Protein CEPHALOPOD; AltName: Full=Protein STEROL METHYLTRANSFERASE 1 && PF08498:Sterol methyltransferase C-terminal|PF08241:Methyltransferase domain
	LOC110632160	27.8522	34.1431	7.72262	4.43617	24-methylenesterol C-methyltransferase 2 && Q39227.2 RecName: Full=24-methylenesterol C-methyltransferase 2; Short=24-sterol C-methyltransferase 2; Short=Sterol-C-methyltransferase 2; AltName: Full=Protein COTYLEDON VASCULAR PATTERN 1 && PF08241:Methyltransferase domain|PF08498:Sterol methyltransferase C-terminal
	LOC110662259	21.6866	19.4296	4.28546	10.0946	3beta-hydroxysteroid-dehydrogenase/decarboxylase && Q67ZE1.2 RecName: Full=3beta-hydroxysteroid-dehydrogenase/decarboxylase isoform 2; Short=At3BETAHSD/D2; AltName: Full=4alpha-carboxysterol-C3-dehydrogenase/C4-decarboxylase isoform 1-2; AltName: Full=Reticulon-like protein B19; Short=AtRTNLB19; AltName: Full=Sterol-4-alpha-carboxylate 3-dehydrogenase 2, decarboxylating && PF02453:Reticulon|PF010…
	LOC110667163	10.6329	9.84128	15.3365	5.6413	probable 3-beta-hydroxysteroid-Delta(8)%2CDelta(7)-isomerase%2C transcript variant X3 && Q9FTZ2.1 RecName: Full=Probable 3-beta-hydroxysteroid-Delta(8),Delta(7)-isomerase; AltName: Full=Cholestenol Delta-isomerase; AltName: Full=Delta(8)-Delta(7) sterol isomerase; Short=D8-D7 sterol isomerase && PF05241:Emopamil binding protein
	LOC110633570	8.87033	6.71122	7.76168	18.0338	squalene epoxidase 3-like%2C transcript variant X1 && Q8VYH2.1 RecName: Full=Squalene epoxidase 3; Short=AtSQE3 && PF08491:Squalene epoxidase|PF13456:Reverse transcriptase-like
	LOC110663703	15.8324	10.5295	5.9722	8.99004	delta(14)-sterol reductase%2C transcript variant X1 && Q9LDR4.2 RecName: Full=Delta(14)-sterol reductase; AltName: Full=C-14 sterol reductase; AltName: Full=Protein FACKEL; AltName: Full=Sterol C14-reductase && PF01222:Ergosterol biosynthesis ERG4/ERG24 family
	LOC110663613	11.7453	12.1436	1.24312	11.2721	sterol 14-demethylase-like%2C transcript variant X2 && Q9SAA9.1 RecName: Full=Sterol 14-demethylase; AltName: Full=Cytochrome P450 51A2; AltName: Full=Cytochrome P450 51G1; Short=AtCYP51; AltName: Full=Obtusifoliol 14-demethylase; AltName: Full=Protein EMBRYO DEFECTIVE 1738 && PF00067:Cytochrome P450
	LOC110665944	5.50034	12.0494	4.20862	13.6887	7-dehydrocholesterol reductase%2C transcript variant X2 && Q9LDU6.1 RecName: Full=7-dehydrocholesterol reductase; Short=7-DHC reductase; AltName: Full=Protein DWARF 5; AltName: Full=Sterol Delta(7)-reductase && PF01222:Ergosterol biosynthesis ERG4/ERG24 family
	LOC110638791	10.2683	12.5374	3.24382	4.78519	probable 3-beta-hydroxysteroid-Delta(8)%2CDelta(7)-isomerase%2C transcript variant X1 && O48962.1 RecName: Full=Probable 3-beta-hydroxysteroid-Delta(8),Delta(7)-isomerase; AltName: Full=Cholestenol Delta-isomerase; AltName: Full=Delta(8)-Delta(7) sterol isomerase; Short=D8-D7 sterol isomerase && PF05241:Emopamil binding protein
	LOC110654878	7.98257	7.15051	7.46709	7.39759	triacylglycerol lipase SDP1-like%2C transcript variant X3 && Q9LZA6.1 RecName: Full=Triacylglycerol lipase SDP1; AltName: Full=Protein SUGAR-DEPENDENT 1 && PF01734:Patatin-like phospholipase|PF11815:Domain of unknown function (DUF3336)
	LOC110665457	18.988	10.5394	0.00865259	0.121477	squalene monooxygenase-like && O48651.1 RecName: Full=Squalene monooxygenase; AltName: Full=Squalene epoxidase; Short=SE && PF08491:Squalene epoxidase
	LOC110665271	10.9664	10.8666	0.633979	6.31437	cycloeucalenol cycloisomerase-like && Q9M643.1 RecName: Full=Cycloeucalenol cycloisomerase; AltName: Full=Cycloeucalenol--obtusifoliol isomerase; AltName: Full=Cyclopropyl sterol isomerase && -
	LOC110647259	2.98904	1.29972	7.45968	13.9207	squalene monooxygenase-like%2C transcript variant X2 && O48651.1 RecName: Full=Squalene monooxygenase; AltName: Full=Squalene epoxidase; Short=SE && PF08491:Squalene epoxidase
	LOC110640583	1.01867	1.31445	2.84219	10.9349	cytochrome P450 710A1-like && O64697.1 RecName: Full=Cytochrome P450 710A1; AltName: Full=C-22 sterol desaturase && PF00067:Cytochrome P450
	LOC110637585	1.5477	5.06589	0.0224008	8.23673	squalene synthase-like && P53800.1 RecName: Full=Squalene synthase; Short=SQS; Short=SS; AltName: Full=FPP:FPP farnesyltransferase; AltName: Full=Farnesyl-diphosphate farnesyltransferase && PF00494:Squalene/phytoene synthase
	LOC110639226	3.24163	2.71047	1.77831	3.45727	3beta-hydroxysteroid-dehydrogenase/decarboxylase && A9X4U2.2 RecName: Full=3beta-hydroxysteroid-dehydrogenase/decarboxylase isoform 3; Short=At3BETAHSD/D3; AltName: Full=4alpha-carboxysterol-C3-dehydrogenase/C4-decarboxylase isoform 1-3; AltName: Full=Reticulon-like protein B20; Short=AtRTNLB20; AltName: Full=Sterol-4-alpha-carboxylate 3-dehydrogenase 3, decarboxylating && PF02453:Reticulon|PF010…
	LOC110656002	3.56384	3.94921	1.34439	2.09542	triacylglycerol lipase 1-like%2C transcript variant X2 && Q71DJ5.1 RecName: Full=Triacylglycerol lipase 1; Flags: Precursor && PF04083:Partial alpha/beta-hydrolase lipase region
	LOC110671373	4.66925	0.181357	4.78344	0.187055	7-dehydrocholesterol reductase-like%2C transcript variant X1 && Q9LDU6.1 RecName: Full=7-dehydrocholesterol reductase; Short=7-DHC reductase; AltName: Full=Protein DWARF 5; AltName: Full=Sterol Delta(7)-reductase && PF01222:Ergosterol biosynthesis ERG4/ERG24 family
	LOC110673494	2.70837	0.99695	2.23252	2.22302	- && O48651.1 RecName: Full=Squalene monooxygenase; AltName: Full=Squalene epoxidase; Short=SE && PF08491:Squalene epoxidase
	LOC110663526	2.24257	2.4652	1.30208	1.4198	triacylglycerol lipase 1-like%2C transcript variant X7 && Q71DJ5.1 RecName: Full=Triacylglycerol lipase 1; Flags: Precursor && PF04083:Partial alpha/beta-hydrolase lipase region
	LOC110662172	0.718771	2.64077	0.0409074	0.461937	delta(7)-sterol-C5(6)-desaturase-like && Q9ZT29.1 RecName: Full=Delta(7)-sterol-C5(6)-desaturase; AltName: Full=Delta(7)-sterol-C5-desaturase; AltName: Full=Delta-7-C-5 sterol desaturase && PF04116:Fatty acid hydroxylase superfamily
	LOC110631783	1.03836	0.890427	0.0358513	0.208512	methylsterol monooxygenase 1-1-like && Q8L7W5.1 RecName: Full=Methylsterol monooxygenase 1-1; AltName: Full=Sterol 4-alpha-methyl-oxidase 1-1; Short=AtSMO1-1 && PF04116:Fatty acid hydroxylase superfamily
	LOC110666477	0.994893	0.883874	0.00871005	0.00919034	squalene epoxidase 3-like%2C transcript variant X1 && O48651.1 RecName: Full=Squalene monooxygenase; AltName: Full=Squalene epoxidase; Short=SE && PF08491:Squalene epoxidase
	LOC110636927	0.708335	0.738634	0	0.36545	methylsterol monooxygenase 2-2%2C transcript variant X1 && Q8VWZ8.1 RecName: Full=Methylsterol monooxygenase 2-2; AltName: Full=Sterol 4-alpha-methyl-oxidase 1; Short=AtSMO1; AltName: Full=Sterol 4-alpha-methyl-oxidase 2-2 && PF04116:Fatty acid hydroxylase superfamily
	LOC110673112	0.141839	0.0131963	1.4906	0.101929	- && Q67ZE1.2 RecName: Full=3beta-hydroxysteroid-dehydrogenase/decarboxylase isoform 2; Short=At3BETAHSD/D2; AltName: Full=4alpha-carboxysterol-C3-dehydrogenase/C4-decarboxylase isoform 1-2; AltName: Full=Reticulon-like protein B19; Short=AtRTNLB19; AltNa
	LOC110661063	0.979423	0.309699	0.127457	0.174975	triacylglycerol lipase 2-like%2C transcript variant X2 && Q67ZU1.1 RecName: Full=Triacylglycerol lipase 2; Flags: Precursor && PF04083:Partial alpha/beta-hydrolase lipase region
	LOC110671892	0.603973	0.529914	0	0.39094	cycloeucalenol cycloisomerase-like%2C transcript variant X2 && Q9M643.1 RecName: Full=Cycloeucalenol cycloisomerase; AltName: Full=Cycloeucalenol--obtusifoliol isomerase; AltName: Full=Cyclopropyl sterol isomerase && -
	LOC110643574	0.0419595	1.39009	0	0	squalene monooxygenase-like && O48651.1 RecName: Full=Squalene monooxygenase; AltName: Full=Squalene epoxidase; Short=SE && PF08491:Squalene epoxidase
	LOC110636928	0.295641	0.303553	0	0.183899	methylsterol monooxygenase 2-2-like%2C transcript variant X1 && Q8VWZ8.1 RecName: Full=Methylsterol monooxygenase 2-2; AltName: Full=Sterol 4-alpha-methyl-oxidase 1; Short=AtSMO1; AltName: Full=Sterol 4-alpha-methyl-oxidase 2-2 && PF04116:Fatty acid hydroxylase superfamily
	LOC110659836	0.377016	0.267039	0	0	24-methylenesterol C-methyltransferase 2-like && Q39227.2 RecName: Full=24-methylenesterol C-methyltransferase 2; Short=24-sterol C-methyltransferase 2; Short=Sterol-C-methyltransferase 2; AltName: Full=Protein COTYLEDON VASCULAR PATTERN 1 && PF08498:Sterol methyltransferase C-terminal|PF08241:Methyltransferase domain
	LOC110673117	0.163093	0.125269	0.0998229	0.132475	uncharacterized LOC110673117 && Q67ZE1.2 RecName: Full=3beta-hydroxysteroid-dehydrogenase/decarboxylase isoform 2; Short=At3BETAHSD/D2; AltName: Full=4alpha-carboxysterol-C3-dehydrogenase/C4-decarboxylase isoform 1-2; AltName: Full=Reticulon-like protein B19; Short=AtRTNLB19; AltName: Full=Sterol-4-alpha-carboxylate 3-dehydrogenase 2, decarboxylating && -
	LOC110652368	0	0.140441	0	0.362084	uncharacterized LOC110652368 && Q9FX01.1 RecName: Full=3beta-hydroxysteroid-dehydrogenase/decarboxylase isoform 1; Short=At3BETAHSD/D1; AltName: Full=4alpha-carboxysterol-C3-dehydrogenase/C4-decarboxylase isoform 1-1; AltName: Full=Reticulon-like protein B24; Short=AtRTNLB24; AltName: Full=Sterol-4-alpha-carboxylate 3-dehydrogenase 1, decarboxylating && PF01073:3-beta hydroxysteroid dehydrogenase…
	LOC110661064	0.0918185	0.231603	0.0703232	0.0787507	triacylglycerol lipase 2-like%2C transcript variant X2 && Q67ZU1.1 RecName: Full=Triacylglycerol lipase 2; Flags: Precursor && PF04083:Partial alpha/beta-hydrolase lipase region
	LOC110641298	0.02925	0.0320193	0.0201634	0.193306	- && O48651.1 RecName: Full=Squalene monooxygenase; AltName: Full=Squalene epoxidase; Short=SE && PF08491:Squalene epoxidase
	LOC110661066	0.101357	0	0.107115	0.0547341	uncharacterized LOC110661066 && - && -
	LOC110645097	0.0860935	0.0154503	0.0182201	0	cytochrome P450 710A1-like && O64697.1 RecName: Full=Cytochrome P450 710A1; AltName: Full=C-22 sterol desaturase && PF00067:Cytochrome P450
	LOC110647686	0.0637703	0	0.0533333	0	methylsterol monooxygenase 1-1-like%2C transcript variant X3 && Q8L7W5.1 RecName: Full=Methylsterol monooxygenase 1-1; AltName: Full=Sterol 4-alpha-methyl-oxidase 1-1; Short=AtSMO1-1 && PF04116:Fatty acid hydroxylase superfamily
	LOC110658512	0	0.0606648	0.0187036	0	triacylglycerol lipase 2-like && Q67ZU1.1 RecName: Full=Triacylglycerol lipase 2; Flags: Precursor && PF04083:Partial alpha/beta-hydrolase lipase region
	LOC110632271	0.0196592	0.0319751	0.0102603	0	- && P93472.1 RecName: Full=Delta(24)-sterol reductase; AltName: Full=Cell elongation protein diminuto && PF01565:FAD binding domain
	LOC110635156	0	0	0	0.0236919	squalene monooxygenase-like && O48651.1 RecName: Full=Squalene monooxygenase; AltName: Full=Squalene epoxidase; Short=SE && PF08491:Squalene epoxidase|PF13450:NAD(P)-binding Rossmann-like domain
	LOC110635155	0	0	0.0170694	0	squalene monooxygenase-like && O48651.1 RecName: Full=Squalene monooxygenase; AltName: Full=Squalene epoxidase; Short=SE && PF08491:Squalene epoxidase|PF13450:NAD(P)-binding Rossmann-like domain
	LOC110635157	0	0	0.00949937	0	- && O48651.1 RecName: Full=Squalene monooxygenase; AltName: Full=Squalene epoxidase; Short=SE && PF08491:Squalene epoxidase
	LOC110650135	0.00861376	0	0	0	- && O48651.1 RecName: Full=Squalene monooxygenase; AltName: Full=Squalene epoxidase; Short=SE && PF08491:Squalene epoxidase|PF14244:gag-polypeptide of LTR copia-type
	LOC110663875	0	0	0.00483391	0	cycloartenol synthase 2-like%2C transcript variant X3 && Q9SXV6.1 RecName: Full=Cycloartenol synthase && PF13243:Squalene-hopene cyclase C-terminal domain|PF13249:Squalene-hopene cyclase N-terminal domain
Sesquiterpenoid and triterpenoid biosynthesis (pop00909)	LOC110644111	314.81	183.42	11.4612	103.348	squalene synthase-like%2C transcript variant X1 && P53800.1 RecName: Full=Squalene synthase; Short=SQS; Short=SS; AltName: Full=FPP:FPP farnesyltransferase; AltName: Full=Farnesyl-diphosphate farnesyltransferase && PF00494:Squalene/phytoene synthase
	LOC110646492	28.5755	32.9561	15.8766	43.629	squalene synthase-like && P53800.1 RecName: Full=Squalene synthase; Short=SQS; Short=SS; AltName: Full=FPP:FPP farnesyltransferase; AltName: Full=Farnesyl-diphosphate farnesyltransferase && PF00494:Squalene/phytoene synthase
	LOC110669811	24.3076	36.5629	3.84799	40.1993	squalene monooxygenase-like && O48651.1 RecName: Full=Squalene monooxygenase; AltName: Full=Squalene epoxidase; Short=SE && PF08491:Squalene epoxidase
	LOC110633570	8.87033	6.71122	7.76168	18.0338	squalene epoxidase 3-like%2C transcript variant X1 && Q8VYH2.1 RecName: Full=Squalene epoxidase 3; Short=AtSQE3 && PF08491:Squalene epoxidase|PF13456:Reverse transcriptase-like
	LOC110664353	9.36271	11.977	8.77964	6.64662	putative dihydroflavonol 4-reductase && Q67ZE1.2 RecName: Full=3beta-hydroxysteroid-dehydrogenase/decarboxylase isoform 2; Short=At3BETAHSD/D2; AltName: Full=4alpha-carboxysterol-C3-dehydrogenase/C4-decarboxylase isoform 1-2; AltName: Full=Reticulon-like protein B19; Short=AtRTNLB19; AltName: Full=Sterol-4-alpha-carboxylate 3-dehydrogenase 2, decarboxylating && PF01370:NAD dependent epimerase/deh…
	LOC110665457	18.988	10.5394	0.00865259	0.121477	squalene monooxygenase-like && O48651.1 RecName: Full=Squalene monooxygenase; AltName: Full=Squalene epoxidase; Short=SE && PF08491:Squalene epoxidase
	LOC110647259	2.98904	1.29972	7.45968	13.9207	squalene monooxygenase-like%2C transcript variant X2 && O48651.1 RecName: Full=Squalene monooxygenase; AltName: Full=Squalene epoxidase; Short=SE && PF08491:Squalene epoxidase
	LOC110637585	1.5477	5.06589	0.0224008	8.23673	squalene synthase-like && P53800.1 RecName: Full=Squalene synthase; Short=SQS; Short=SS; AltName: Full=FPP:FPP farnesyltransferase; AltName: Full=Farnesyl-diphosphate farnesyltransferase && PF00494:Squalene/phytoene synthase
	LOC110673494	2.70837	0.99695	2.23252	2.22302	- && O48651.1 RecName: Full=Squalene monooxygenase; AltName: Full=Squalene epoxidase; Short=SE && PF08491:Squalene epoxidase
	LOC110668616	1.75769	1.28736	1.67199	3.19189	- && Q6Q3H3.1 RecName: Full=(-)-germacrene D synthase && PF03936:Terpene synthase family, metal binding domain|PF01397:Terpene synthase, N-terminal domain
	LOC110654302	2.22482	1.48225	1.42688	1.0059	- && Q6Q3H3.1 RecName: Full=(-)-germacrene D synthase && PF03936:Terpene synthase family, metal binding domain|PF01397:Terpene synthase, N-terminal domain
	LOC110642893	0	3.48479	0	1.46979	- && B9S9Z3.1 RecName: Full=Alpha-copaene synthase; AltName: Full=(+)-delta-cadinene synthase; AltName: Full=Terpene synthase 1; Short=RcSeTPS1 && PF01397:Terpene synthase, N-terminal domain|PF03936:Terpene synthase family, metal binding domain
	LOC110634126	1.27782	1.07557	0.0302026	0.763901	beta-amyrin synthase-like%2C transcript variant X2 && A8CDT2.1 RecName: Full=Beta-amyrin synthase; Short=BgbAS && PF13249:Squalene-hopene cyclase N-terminal domain|PF13243:Squalene-hopene cyclase C-terminal domain
	LOC110663316	0.873125	0.49772	0.637609	0.846179	- && Q6Q3H3.1 RecName: Full=(-)-germacrene D synthase && PF01397:Terpene synthase, N-terminal domain|PF03936:Terpene synthase family, metal binding domain
	LOC110666477	0.994893	0.883874	0.00871005	0.00919034	squalene epoxidase 3-like%2C transcript variant X1 && O48651.1 RecName: Full=Squalene monooxygenase; AltName: Full=Squalene epoxidase; Short=SE && PF08491:Squalene epoxidase
	LOC110643574	0.0419595	1.39009	0	0	squalene monooxygenase-like && O48651.1 RecName: Full=Squalene monooxygenase; AltName: Full=Squalene epoxidase; Short=SE && PF08491:Squalene epoxidase
	LOC110639792	0.0270124	0	0.166083	0.221534	- && Q2XPU7.1 RecName: Full=Lupeol synthase && PF13249:Squalene-hopene cyclase N-terminal domain|PF13243:Squalene-hopene cyclase C-terminal domain
	LOC110641298	0.02925	0.0320193	0.0201634	0.193306	- && O48651.1 RecName: Full=Squalene monooxygenase; AltName: Full=Squalene epoxidase; Short=SE && PF08491:Squalene epoxidase
	LOC110662165	0	0.194906	0	0.0188259	probable terpene synthase 3 && B9SBV6.1 RecName: Full=Probable terpene synthase 3; Short=RcSeTPS3 && PF03936:Terpene synthase family, metal binding domain|PF01397:Terpene synthase, N-terminal domain
	LOC110650225	0.150399	0.0586736	0	0	lupeol synthase-like%2C transcript variant X2 && Q2XPU7.1 RecName: Full=Lupeol synthase && PF13243:Squalene-hopene cyclase C-terminal domain|PF13249:Squalene-hopene cyclase N-terminal domain
	LOC110652377	0.100734	0	0	0	lupeol synthase-like%2C transcript variant X3 && Q2XPU7.1 RecName: Full=Lupeol synthase && PF13243:Squalene-hopene cyclase C-terminal domain
	LOC110651734	0.0439243	0.0419786	0	0	lupeol synthase-like && Q2XPU7.1 RecName: Full=Lupeol synthase && PF13249:Squalene-hopene cyclase N-terminal domain|PF13243:Squalene-hopene cyclase C-terminal domain
	LOC110634117	0.054006	0.00578089	0	0	beta-amyrin synthase-like%2C transcript variant X2 && A8CDT2.1 RecName: Full=Beta-amyrin synthase; Short=BgbAS && PF13243:Squalene-hopene cyclase C-terminal domain|PF13249:Squalene-hopene cyclase N-terminal domain
	LOC110661963	0	0	0.031733	0.0234554	probable terpene synthase 4 && B9RHX7.1 RecName: Full=Probable terpene synthase 4; Short=RcSeTPS4 && PF01397:Terpene synthase, N-terminal domain|PF03936:Terpene synthase family, metal binding domain
	LOC110654947	0	0	0.0453576	0	probable terpene synthase 13%2C transcript variant X3 && B9RXW4.1 RecName: Full=Probable terpene synthase 13; Short=RcSeTPS13 && PF01397:Terpene synthase, N-terminal domain|PF03936:Terpene synthase family, metal binding domain
	LOC110665723	0.0414127	0	0	0	beta-amyrin synthase && A8CDT2.1 RecName: Full=Beta-amyrin synthase; Short=BgbAS && PF13243:Squalene-hopene cyclase C-terminal domain|PF13249:Squalene-hopene cyclase N-terminal domain
	LOC110645764	0.0261326	0	0	0.00937853	alpha-copaene synthase-like && B9S9Z3.1 RecName: Full=Alpha-copaene synthase; AltName: Full=(+)-delta-cadinene synthase; AltName: Full=Terpene synthase 1; Short=RcSeTPS1 && PF01397:Terpene synthase, N-terminal domain|PF03936:Terpene synthase family, metal binding domain
	LOC110650236	0.0131873	0.0150716	0	0	lupeol synthase-like && Q2XPU7.1 RecName: Full=Lupeol synthase && PF13249:Squalene-hopene cyclase N-terminal domain
	LOC110635156	0	0	0	0.0236919	squalene monooxygenase-like && O48651.1 RecName: Full=Squalene monooxygenase; AltName: Full=Squalene epoxidase; Short=SE && PF08491:Squalene epoxidase|PF13450:NAD(P)-binding Rossmann-like domain
	LOC110670038	0	0	0	0.021581	probable terpene synthase 3 && Q6Q3H3.1 RecName: Full=(-)-germacrene D synthase && PF03936:Terpene synthase family, metal binding domain|PF01397:Terpene synthase, N-terminal domain
	LOC110635155	0	0	0.0170694	0	squalene monooxygenase-like && O48651.1 RecName: Full=Squalene monooxygenase; AltName: Full=Squalene epoxidase; Short=SE && PF08491:Squalene epoxidase|PF13450:NAD(P)-binding Rossmann-like domain
	LOC110632931	0	0.0152248	0	0	- && B9S9Z3.1 RecName: Full=Alpha-copaene synthase; AltName: Full=(+)-delta-cadinene synthase; AltName: Full=Terpene synthase 1; Short=RcSeTPS1 && PF01397:Terpene synthase, N-terminal domain|PF03936:Terpene synthase family, metal binding domain
	LOC110645151	0.0142312	0	0	0	alpha-copaene synthase-like%2C transcript variant X2 && B9S9Z3.1 RecName: Full=Alpha-copaene synthase; AltName: Full=(+)-delta-cadinene synthase; AltName: Full=Terpene synthase 1; Short=RcSeTPS1 && PF01397:Terpene synthase, N-terminal domain|PF03936:Terpene synthase family, metal binding domain
	LOC110651556	0	0	0	0.0128422	alpha-copaene synthase-like && B9S9Z3.1 RecName: Full=Alpha-copaene synthase; AltName: Full=(+)-delta-cadinene synthase; AltName: Full=Terpene synthase 1; Short=RcSeTPS1 && PF03936:Terpene synthase family, metal binding domain|PF01397:Terpene synthase, N-terminal domain
	LOC110635157	0	0	0.00949937	0	- && O48651.1 RecName: Full=Squalene monooxygenase; AltName: Full=Squalene epoxidase; Short=SE && PF08491:Squalene epoxidase
	LOC110650135	0.00861376	0	0	0	- && O48651.1 RecName: Full=Squalene monooxygenase; AltName: Full=Squalene epoxidase; Short=SE && PF08491:Squalene epoxidase|PF14244:gag-polypeptide of LTR copia-type
	LOC110654191	0	0.0067883	0	0	beta-amyrin synthase-like && A8CDT2.1 RecName: Full=Beta-amyrin synthase; Short=BgbAS && PF13243:Squalene-hopene cyclase C-terminal domain|PF13249:Squalene-hopene cyclase N-terminal domain
	LOC110647746	0	0	0.00508612	0	- && E7DN63.1 RecName: Full=Beta-amyrin synthase; AltName: Full=Triterpenoid synthase 1; Short=SlTTS1 && PF13249:Squalene-hopene cyclase N-terminal domain|PF13243:Squalene-hopene cyclase C-terminal domain|PF00432:Prenyltransferase and squalene oxidase rep
Ubiquinone and other terpenoid-quinone biosynthesis (pop00130)	LOC110645645	148.812	157.835	77.9645	118.622	2-methyl-6-phytyl-1%2C4-hydroquinone methyltransferase%2C chloroplastic-like && P23525.1 RecName: Full=2-methyl-6-phytyl-1,4-hydroquinone methyltransferase, chloroplastic; AltName: Full=37 kDa inner envelope membrane protein; Short=E37; AltName: Full=MPBQ/MSBQ methyltransferase; Flags: Precursor && PF08241:Methyltransferase domain
	LOC110631738	97.5333	117.971	57.4473	99.3278	2-methyl-6-phytyl-1%2C4-hydroquinone methyltransferase%2C chloroplastic && P23525.1 RecName: Full=2-methyl-6-phytyl-1,4-hydroquinone methyltransferase, chloroplastic; AltName: Full=37 kDa inner envelope membrane protein; Short=E37; AltName: Full=MPBQ/MSBQ methyltransferase; Flags: Precursor && PF08241:Methyltransferase domain
	LOC110641348	73.4651	56.6808	87.78	59.5475	ubiquinone biosynthesis monooxygenase COQ6%2C mitochondrial-like && Q9Y2Z9.2 RecName: Full=Ubiquinone biosynthesis monooxygenase COQ6, mitochondrial; AltName: Full=Coenzyme Q10 monooxygenase 6; Flags: Precursor && PF01494:FAD binding domain
	LOC110635723	46.6332	35.9877	22.6602	110.762	homogentisate geranylgeranyltransferase-like && Q7XB14.1 RecName: Full=Homogentisate geranylgeranyltransferase; Short=HGGT; Flags: Precursor && PF01040:UbiA prenyltransferase family
	LOC110643647	24.6112	25.5031	33.7842	66.0983	1%2C4-dihydroxy-2-naphthoyl-CoA thioesterase 1%2C transcript variant X2 && Q9SX65.1 RecName: Full=1,4-dihydroxy-2-naphthoyl-CoA thioesterase 1; Short=AtDHNAT1; Short=DHNA-CoA thioesterase 1 && PF03061:Thioesterase superfamily
	LOC110669879	28.2362	32.0894	38.8417	31.2282	tocopherol cyclase%2C chloroplastic%2C transcript variant X3 && Q94FY7.1 RecName: Full=Tocopherol cyclase, chloroplastic; AltName: Full=Sucrose export defective 1; AltName: Full=Vitamin E pathway gene 1 protein; Flags: Precursor && PF14249:Tocopherol cyclase
	LOC110649073	33.9544	29.9396	20.479	35.8183	homogentisate solanesyltransferase%2C chloroplastic%2C transcript variant X1 && Q0D576.2 RecName: Full=Probable homogentisate phytyltransferase 2, chloroplastic; AltName: Full=Vitamin E pathway gene 2-2 protein; Short=OsVTE2-2; Flags: Precursor && PF01040:UbiA prenyltransferase family
	LOC110642734	24.4001	26.5831	14.9525	44.4902	probable aminotransferase TAT2 && Q9FN30.1 RecName: Full=Probable aminotransferase TAT2; AltName: Full=Tyrosine aminotransferase 2 && PF00155:Aminotransferase class I and II
	LOC110663468	20.3761	26.6153	16.6801	10.7168	4-hydroxyphenylpyruvate dioxygenase%2C transcript variant X1 && P93836.2 RecName: Full=4-hydroxyphenylpyruvate dioxygenase; AltName: Full=4-hydroxyphenylpyruvic acid oxidase; Short=4HPPD; Short=HPD; Short=HPPDase && -
	LOC110669961	9.39164	9.66639	33.9223	12.751	probable NAD(P)H dehydrogenase (quinone) FQR1-like 2 && O23207.1 RecName: Full=Probable NAD(P)H dehydrogenase (quinone) FQR1-like 2 && PF03358:NADPH-dependent FMN reductase
	LOC110651279	25.5964	11.1607	10.8455	5.77031	probable NAD(P)H dehydrogenase (quinone) FQR1-like 2%2C transcript variant X2 && O23207.1 RecName: Full=Probable NAD(P)H dehydrogenase (quinone) FQR1-like 2 && PF03358:NADPH-dependent FMN reductase
	LOC110649540	9.52504	8.3318	16.6452	10.9612	ubiquinone biosynthesis O-methyltransferase%2C mitochondrial-like%2C transcript variant X1 && O49354.2 RecName: Full=Ubiquinone biosynthesis O-methyltransferase, mitochondrial; AltName: Full=3-demethylubiquinol 3-O-methyltransferase; AltName: Full=EMBRYO DEFECTIVE 3002; AltName: Full=Polyprenyldihydroxybenzoate methyltransferase; Flags: Precursor && PF13489:Methyltransferase domain
	LOC110636214	8.50668	8.22223	13.7785	8.10774	2-methyl-6-phytyl-1%2C4-hydroquinone methyltransferase%2C chloroplastic-like && P23525.1 RecName: Full=2-methyl-6-phytyl-1,4-hydroquinone methyltransferase, chloroplastic; AltName: Full=37 kDa inner envelope membrane protein; Short=E37; AltName: Full=MPBQ/MSBQ methyltransferase; Flags: Precursor && PF08241:Methyltransferase domain
	LOC110637148	16.117	3.73292	10.7805	0.543166	trans-cinnamate 4-monooxygenase && Q43054.1 RecName: Full=Trans-cinnamate 4-monooxygenase; AltName: Full=Cinnamic acid 4-hydroxylase; Short=C4H; Short=CA4H; AltName: Full=Cytochrome P450 73; AltName: Full=Cytochrome P450C4H [Populus sieboldii x Populus grandidentata] && PF00067:Cytochrome P450
	LOC110641120	6.5505	0.151106	16.7991	2.16297	4-coumarate--CoA ligase-like 7 && Q9M0X9.1 RecName: Full=4-coumarate--CoA ligase-like 7; AltName: Full=4-coumarate--CoA ligase isoform 6; Short=At4CL6 && PF00501:AMP-binding enzyme|PF13193:AMP-binding enzyme C-terminal domain
	LOC110667913	5.92951	8.13631	6.48281	3.92004	probable NAD(P)H dehydrogenase (quinone) FQR1-like 1%2C transcript variant X2 && O23207.1 RecName: Full=Probable NAD(P)H dehydrogenase (quinone) FQR1-like 2 && PF03358:NADPH-dependent FMN reductase
	LOC110644484	5.85626	5.11309	8.659	1.48127	probable NAD(P)H dehydrogenase (quinone) FQR1-like 1 && Q6NQE2.1 RecName: Full=Probable NAD(P)H dehydrogenase (quinone) FQR1-like 1 && PF03358:NADPH-dependent FMN reductase
	LOC110664978	3.27306	4.16017	5.98771	2.50237	2-methoxy-6-polyprenyl-1%2C4-benzoquinol methylase%2C mitochondrial%2C transcript variant X3 && Q9LVC8.1 RecName: Full=2-methoxy-6-polyprenyl-1,4-benzoquinol methylase, mitochondrial; AltName: Full=Ubiquinone biosynthesis methyltransferase COQ5; Flags: Precursor && PF01209:ubiE/COQ5 methyltransferase family
	LOC110648244	4.17174	5.68277	1.90636	3.30757	4-coumarate--CoA ligase-like 6 && Q84P24.2 RecName: Full=4-coumarate--CoA ligase-like 6; AltName: Full=4-coumarate--CoA ligase isoform 7; Short=At4CL7 && PF13193:AMP-binding enzyme C-terminal domain|PF00501:AMP-binding enzyme
	LOC110644714	10.2287	3.11359	0.906244	0.139944	4-coumarate--CoA ligase 1-like && O24145.1 RecName: Full=4-coumarate--CoA ligase 1; Short=4CL 1; AltName: Full=4-coumaroyl-CoA synthase 1 && PF13193:AMP-binding enzyme C-terminal domain|PF00501:AMP-binding enzyme
	LOC110657850	1.17847	0.576239	8.63127	1.41616	protein PHYLLO%2C chloroplastic-like && Q15KI9.2 RecName: Full=Protein PHYLLO, chloroplastic; Includes: RecName: Full=Inactive isochorismate synthase; AltName: Full=MENF; Includes: RecName: Full=2-succinyl-5-enolpyruvyl-6-hydroxy-3-cyclohexene-1-carboxylate synthase; AltName: Full=MEND; Includes: RecName: Full=o-succinylbenzoate synthase; AltName: Full=MENC; Includes: RecName: Full=2-succinyl-6-h…
	LOC110667560	3.16362	4.65111	1.01842	2.20651	4-coumarate--CoA ligase-like 9 && Q84P23.2 RecName: Full=4-coumarate--CoA ligase-like 9; AltName: Full=4-coumarate--CoA ligase isoform 4; Short=At4CL4 && PF13193:AMP-binding enzyme C-terminal domain|PF00501:AMP-binding enzyme
	LOC110641636	1.99834	0.128008	7.39967	1.43801	uncharacterized LOC110641636 && Q8GYN9.2 RecName: Full=1,4-dihydroxy-2-naphthoyl-CoA synthase, peroxisomal; Short=DHNS; AltName: Full=Enoyl-CoA hydratase/isomerase D; Short=ECHID; AltName: Full=Naphthoate synthase && -
	LOC110666362	2.02839	1.7468	4.82061	2.24234	probable NAD(P)H dehydrogenase (quinone) FQR1-like 3%2C transcript variant X2 && Q9LUX9.1 RecName: Full=Probable NAD(P)H dehydrogenase (quinone) FQR1-like 3 && PF03358:NADPH-dependent FMN reductase
	LOC110650666	2.3807	1.97235	3.00621	2.59101	4-hydroxybenzoate polyprenyltransferase%2C mitochondrial%2C transcript variant X5 && Q93YP7.1 RecName: Full=4-hydroxybenzoate polyprenyltransferase, mitochondrial; Short=4-HB polyprenyltransferase; Short=4HPT; AltName: Full=4-hydroxybenzoate nonaprenyltransferase; AltName: Full=Para-hydroxybenzoate--polyprenyltransferase; Short=PHB:PPT; Short=PHB:polyprenyltransferase; AltName: Full=Polyprenyltra…
	LOC110659616	1.27662	6.15419	0.230811	2.16726	probable tocopherol O-methyltransferase%2C chloroplastic%2C transcript variant X1 && Q6ZIK0.1 RecName: Full=Probable tocopherol O-methyltransferase, chloroplastic; AltName: Full=Gamma-tocopherol methyltransferase; AltName: Full=Vitamin E pathway gene 4 protein; Flags: Precursor && PF08241:Methyltransferase domain
	LOC110659741	5.63441	3.525	0.0137409	0.0547287	ubiquinone biosynthesis O-methyltransferase%2C mitochondrial-like && O49354.2 RecName: Full=Ubiquinone biosynthesis O-methyltransferase, mitochondrial; AltName: Full=3-demethylubiquinol 3-O-methyltransferase; AltName: Full=EMBRYO DEFECTIVE 3002; AltName: Full=Polyprenyldihydroxybenzoate methyltransferase; Flags: Precursor && PF13456:Reverse transcriptase-like|PF13489:Methyltransferase domain
	LOC110643143	5.39493	1.90632	1.15778	0.580266	NAD(P)H dehydrogenase (quinone) FQR1-like && Q9LSQ5.1 RecName: Full=NAD(P)H dehydrogenase (quinone) FQR1; AltName: Full=Flavodoxin-like quinone reductase 1 && PF03358:NADPH-dependent FMN reductase
	LOC110654941	4.02183	4.86852	0.0181625	0.074246	probable NAD(P)H dehydrogenase (quinone) FQR1-like 1%2C transcript variant X1 && Q6NQE2.1 RecName: Full=Probable NAD(P)H dehydrogenase (quinone) FQR1-like 1 && PF03358:NADPH-dependent FMN reductase
	novel.747	2.52308	1.55497	2.20631	1.98795	PF01494:FAD binding domain
	LOC110657024	2.20443	1.907	2.19483	1.85448	alternative NAD(P)H-ubiquinone oxidoreductase C1%2C chloroplastic/mitochondrial-like%2C transcript variant X2 && Q8GXR9.2 RecName: Full=Alternative NAD(P)H-ubiquinone oxidoreductase C1, chloroplastic/mitochondrial; AltName: Full=Alternative NADH dehydrogenase NDC1; AltName: Full=Demethylphylloquinone reductase NDC1; AltName: Full=NADH:ubiquinone reductase (non-electrogenic) NDC1; Flags: Precursor…
	LOC110665304	2.13964	2.83554	0.562793	1.59395	4-coumarate--CoA ligase-like 9 && Q84P23.2 RecName: Full=4-coumarate--CoA ligase-like 9; AltName: Full=4-coumarate--CoA ligase isoform 4; Short=At4CL4 && PF00501:AMP-binding enzyme|PF13193:AMP-binding enzyme C-terminal domain
	LOC110660355	1.95366	1.03644	2.15577	1.78298	alternative NAD(P)H-ubiquinone oxidoreductase C1%2C chloroplastic/mitochondrial-like && Q8GXR9.2 RecName: Full=Alternative NAD(P)H-ubiquinone oxidoreductase C1, chloroplastic/mitochondrial; AltName: Full=Alternative NADH dehydrogenase NDC1; AltName: Full=Demethylphylloquinone reductase NDC1; AltName: Full=NADH:ubiquinone reductase (non-electrogenic) NDC1; Flags: Precursor && PF07992:Pyridine nucl…
	LOC110666248	0.332574	1.6328	1.90704	1.07261	4-coumarate--CoA ligase-like 7 && Q9M0X9.1 RecName: Full=4-coumarate--CoA ligase-like 7; AltName: Full=4-coumarate--CoA ligase isoform 6; Short=At4CL6 && PF13193:AMP-binding enzyme C-terminal domain|PF00501:AMP-binding enzyme
	LOC110645798	3.10277	1.54094	0	0.0794018	ubiquinone biosynthesis O-methyltransferase%2C mitochondrial-like%2C transcript variant X1 && O49354.2 RecName: Full=Ubiquinone biosynthesis O-methyltransferase, mitochondrial; AltName: Full=3-demethylubiquinol 3-O-methyltransferase; AltName: Full=EMBRYO DEFECTIVE 3002; AltName: Full=Polyprenyldihydroxybenzoate methyltransferase; Flags: Precursor && PF13489:Methyltransferase domain
	LOC110636295	1.96199	1.78687	0.491688	0.3992	tyrosine aminotransferase-like && Q9LVY1.1 RecName: Full=Tyrosine aminotransferase; Short=TAT; AltName: Full=L-tyrosine:2-oxoglutarate aminotransferase && PF00155:Aminotransferase class I and II
	LOC110634007	0	0.0236	3.79714	0	4-coumarate--CoA ligase-like 9 && Q84P23.2 RecName: Full=4-coumarate--CoA ligase-like 9; AltName: Full=4-coumarate--CoA ligase isoform 4; Short=At4CL4 && PF13193:AMP-binding enzyme C-terminal domain|PF00501:AMP-binding enzyme
	LOC110653493	0.568636	0.1292	2.72364	0.271125	cytochrome P450 CYP73A100-like && H2DH22.1 RecName: Full=Cytochrome P450 CYP73A100 [Panax ginseng] && PF00067:Cytochrome P450
	LOC110660726	1.13452	0.57999	1.03231	0.912159	protein PHYLLO%2C chloroplastic%2C transcript variant X1 && Q15KI9.2 RecName: Full=Protein PHYLLO, chloroplastic; Includes: RecName: Full=Inactive isochorismate synthase; AltName: Full=MENF; Includes: RecName: Full=2-succinyl-5-enolpyruvyl-6-hydroxy-3-cyclohexene-1-carboxylate synthase; AltName: Full=MEND; Includes: RecName: Full=o-succinylbenzoate synthase; AltName: Full=MENC; Includes: RecName:…
	LOC110636810	2.35484	0.611509	0.614729	0.046442	4-coumarate--CoA ligase 1-like && O24145.1 RecName: Full=4-coumarate--CoA ligase 1; Short=4CL 1; AltName: Full=4-coumaroyl-CoA synthase 1 && PF00501:AMP-binding enzyme|PF13193:AMP-binding enzyme C-terminal domain
	LOC110662498	0.847107	0.442001	0.854508	0.735975	isochorismate synthase 2%2C chloroplastic-like%2C transcript variant X1 && Q9M9V6.2 RecName: Full=Isochorismate synthase 2, chloroplastic; Short=AtIcs2; AltName: Full=Isochorismate mutase 2; AltName: Full=menF-like protein 2; Flags: Precursor && PF00425:chorismate binding enzyme
	LOC110646147	1.09401	0.400561	0.504203	0.64096	uncharacterized LOC110646147 && - && -
	LOC110673679	0.653426	0.415853	1.02115	0.416524	2-phytyl-1%2C4-beta-naphthoquinone methyltransferase%2C chloroplastic%2C transcript variant X2 && Q3ED65.2 RecName: Full=2-phytyl-1,4-beta-naphthoquinone methyltransferase, chloroplastic; AltName: Full=Demethylphylloquinone methyltransferase; AltName: Full=Menaquinone biosynthesis methyltransferase ubiE-like protein; Flags: Precursor && PF07714:Protein tyrosine kinase|PF01209:ubiE/COQ5 methyltran…
	LOC110646284	0.193892	0.0480718	2.08097	0.0104249	4-coumarate--CoA ligase 2-like && O24146.1 RecName: Full=4-coumarate--CoA ligase 2; Short=4CL 2; AltName: Full=4-coumaroyl-CoA synthase 2 && PF13193:AMP-binding enzyme C-terminal domain|PF00501:AMP-binding enzyme
	LOC110631637	0.348229	0.198974	1.20583	0.318756	1%2C4-dihydroxy-2-naphthoyl-CoA synthase%2C peroxisomal && Q8GYN9.2 RecName: Full=1,4-dihydroxy-2-naphthoyl-CoA synthase, peroxisomal; Short=DHNS; AltName: Full=Enoyl-CoA hydratase/isomerase D; Short=ECHID; AltName: Full=Naphthoate synthase && PF00378:Enoyl-CoA hydratase/isomerase
	LOC110665423	1.14238	0.33363	0.325609	0.212059	probable aminotransferase TAT2 && Q9ST02.2 RecName: Full=Nicotianamine aminotransferase A; AltName: Full=Nicotianamine aminotransferase III; Short=NAAT-III && PF00155:Aminotransferase class I and II
	LOC110631646	0.75831	0.100185	0.52043	0.0532106	2-phytyl-1%2C4-beta-naphthoquinone methyltransferase%2C chloroplastic-like && Q3ED65.2 RecName: Full=2-phytyl-1,4-beta-naphthoquinone methyltransferase, chloroplastic; AltName: Full=Demethylphylloquinone methyltransferase; AltName: Full=Menaquinone biosynthesis methyltransferase ubiE-like protein; Flags: Precursor && PF01209:ubiE/COQ5 methyltransferase family
	LOC110646146	0.522232	0.13023	0.34559	0.380733	- && Q2KIL4.2 RecName: Full=Ubiquinone biosynthesis monooxygenase COQ6, mitochondrial; AltName: Full=Coenzyme Q10 monooxygenase 6; Flags: Precursor && PF01494:FAD binding domain
	LOC110664544	0.358578	0.114964	0.336195	0.0418944	NAD(P)H dehydrogenase (quinone) FQR1-like && Q9LSQ5.1 RecName: Full=NAD(P)H dehydrogenase (quinone) FQR1; AltName: Full=Flavodoxin-like quinone reductase 1 && PF03358:NADPH-dependent FMN reductase
	LOC110641326	0.244375	0.111513	0.217923	0.210915	homogentisate phytyltransferase 1%2C chloroplastic%2C transcript variant X4 && Q8VWJ1.1 RecName: Full=Homogentisate phytyltransferase 1, chloroplastic; Short=AtHPT1; AltName: Full=Tocopherol polyprenyltransferase 1; AltName: Full=Vitamin E pathway gene 2-1 protein; Short=AtVTE2-1; Flags: Precursor && PF01040:UbiA prenyltransferase family
	LOC110638368	0.313932	0.352583	0.0185643	0	- && Q6ZIK0.1 RecName: Full=Probable tocopherol O-methyltransferase, chloroplastic; AltName: Full=Gamma-tocopherol methyltransferase; AltName: Full=Vitamin E pathway gene 4 protein; Flags: Precursor && PF08241:Methyltransferase domain
	LOC110637405	0.34804	0.255788	0.0221986	0	trans-cinnamate 4-monooxygenase-like && O24312.1 RecName: Full=Trans-cinnamate 4-monooxygenase; AltName: Full=Cinnamic acid 4-hydroxylase; Short=C4H; Short=CA4H; AltName: Full=Cytochrome P450 73; AltName: Full=Cytochrome P450C4H [Populus tremuloides] && PF00067:Cytochrome P450
	LOC110646504	0.225646	0.0602746	0.0215133	0.109698	2-carboxy-1%2C4-naphthoquinone phytyltransferase%2C chloroplastic && Q0WUA3.2 RecName: Full=2-carboxy-1,4-naphthoquinone phytyltransferase, chloroplastic; AltName: Full=1,4-dihydroxy-2-naphthoate phytyltransferase; AltName: Full=1,4-dihydroxy-2-naphthoate polyprenyltransferase; AltName: Full=Protein ABERRANT CHLOROPLAST DEVELOPMENT 4; AltName: Full=menA-like protein; Short=AtMENA; Flags: Precurso…
	LOC110658711	0	0	0.165333	0	4-coumarate--CoA ligase 2-like && P31687.2 RecName: Full=4-coumarate--CoA ligase 2; Short=4CL 2; AltName: Full=4-coumaroyl-CoA synthase 2; AltName: Full=Clone 4CL16 && PF13193:AMP-binding enzyme C-terminal domain|PF00501:AMP-binding enzyme
	LOC110665424	0	0	0.159802	0	probable aminotransferase TAT2%2C transcript variant X1 && Q9LVY1.1 RecName: Full=Tyrosine aminotransferase; Short=TAT; AltName: Full=L-tyrosine:2-oxoglutarate aminotransferase && PF00155:Aminotransferase class I and II
	LOC110637156	0.142578	0	0	0	trans-cinnamate 4-monooxygenase-like && O24312.1 RecName: Full=Trans-cinnamate 4-monooxygenase; AltName: Full=Cinnamic acid 4-hydroxylase; Short=C4H; Short=CA4H; AltName: Full=Cytochrome P450 73; AltName: Full=Cytochrome P450C4H [Populus tremuloides] && PF00067:Cytochrome P450
	LOC110641950	0.0554876	0.0302642	0.00965314	0.0219252	2-succinylbenzoate--CoA ligase%2C chloroplastic/peroxisomal && Q8VYJ1.1 RecName: Full=2-succinylbenzoate--CoA ligase, chloroplastic/peroxisomal; AltName: Full=Acyl-activating enzyme 14; AltName: Full=O-succinylbenzoyl-CoA ligase; Flags: Precursor && PF13193:AMP-binding enzyme C-terminal domain|PF00501:AMP-binding enzyme
	LOC110649004	0	0.0850686	0	0	- && Q9LUX9.1 RecName: Full=Probable NAD(P)H dehydrogenase (quinone) FQR1-like 3 && -
	LOC110641433	0.0219708	0	0.0229335	0	4-coumarate--CoA ligase 2-like && P31687.2 RecName: Full=4-coumarate--CoA ligase 2; Short=4CL 2; AltName: Full=4-coumaroyl-CoA synthase 2; AltName: Full=Clone 4CL16 && PF13193:AMP-binding enzyme C-terminal domain|PF00501:AMP-binding enzyme
	LOC110662933	0.0112813	0.0247473	0	0	homogentisate geranylgeranyltransferase-like && Q7XB14.1 RecName: Full=Homogentisate geranylgeranyltransferase; Short=HGGT; Flags: Precursor && PF01040:UbiA prenyltransferase family
	LOC110665143	0.0181657	0.00965441	0	0	trans-cinnamate 4-monooxygenase-like && O24312.1 RecName: Full=Trans-cinnamate 4-monooxygenase; AltName: Full=Cinnamic acid 4-hydroxylase; Short=C4H; Short=CA4H; AltName: Full=Cytochrome P450 73; AltName: Full=Cytochrome P450C4H [Populus tremuloides] && PF00067:Cytochrome P450
	LOC110651859	0	0.0178647	0	0	4-coumarate--CoA ligase-like 1 && Q9LQ12.1 RecName: Full=4-coumarate--CoA ligase-like 1; AltName: Full=4-coumarate--CoA ligase isoform 10; Short=At4CL10 && PF13193:AMP-binding enzyme C-terminal domain|PF00501:AMP-binding enzyme
Carotenoid	LOC110638861	1.74572	0.220167	1.62736	6.02819	phytoene synthase 2%2C chloroplastic%2C transcript variant X2 && P49293.1 RecName: Full=Phytoene synthase, chloroplastic; AltName: Full=MEL5; Flags: Precursor && PF00494:Squalene/phytoene synthase
	LOC110645653	6.52497	2.03024	5.15749	5.49849	uncharacterized LOC110645653%2C transcript variant X4 && C7AU21.1 RecName: Full=Beta-carotene isomerase D27, chloroplastic; AltName: Full=Protein DWARF-27; Flags: Precursor && -
	LOC110633595	4.08263	2.14508	1.59734	2.11126	lycopene epsilon cyclase%2C chloroplastic && Q38932.2 RecName: Full=Lycopene epsilon cyclase, chloroplastic; AltName: Full=Protein LUTEIN DEFICIENT 2; Flags: Precursor && PF05834:Lycopene cyclase protein
	LOC110643463	0.192038	0.233613	10.1498	0.231748	beta-carotene hydroxylase 2%2C chloroplastic-like && O49814.1 RecName: Full=Beta-carotene hydroxylase 2, chloroplastic; Flags: Precursor && PF04116:Fatty acid hydroxylase superfamily
	LOC110637173	11.2651	9.10299	105.326	23.7894	phytoene synthase 2%2C chloroplastic-like && P49293.1 RecName: Full=Phytoene synthase, chloroplastic; AltName: Full=MEL5; Flags: Precursor && PF00494:Squalene/phytoene synthase
	LOC110665731	14.9027	10.3123	3.58186	14.1181	protein LUTEIN DEFICIENT 5%2C chloroplastic && Q93VK5.1 RecName: Full=Protein LUTEIN DEFICIENT 5, chloroplastic; AltName: Full=Cytochrome P450 97A3; Flags: Precursor && PF00067:Cytochrome P450
	LOC110657770	0.126636	0.0483784	1.40242	1.38716	carotenoid cleavage dioxygenase 7%2C chloroplastic && Q7XJM2.1 RecName: Full=Carotenoid cleavage dioxygenase 7, chloroplastic; Short=AtCCD7; AltName: Full=AtNCED7; AltName: Full=Beta,beta-carotene 9',10'-oxygenase; AltName: Full=Protein MORE AXILLARY BRANCHING 3; AltName: Full=Protein MORE AXILLARY GROWTH 3; Flags: Precursor && PF03055:Retinal pigment epithelial membrane protein
	LOC110631731	0.0385563	0	2.31352	13.0422	beta-carotene isomerase D27%2C chloroplastic-like%2C transcript variant X2 && C7AU21.1 RecName: Full=Beta-carotene isomerase D27, chloroplastic; AltName: Full=Protein DWARF-27; Flags: Precursor && PF13225:Domain of unknown function (DUF4033)
	LOC110643639	6.5509	2.29294	0.858747	2.68498	abscisic acid 8'-hydroxylase 4-like && Q9LJK2.2 RecName: Full=Abscisic acid 8'-hydroxylase 4; Short=ABA 8'-hydroxylase 4; AltName: Full=Cytochrome P450 707A4 && PF00067:Cytochrome P450
	LOC110642436	1.25135	0.905561	0.233253	0.500007	- && Q38932.2 RecName: Full=Lycopene epsilon cyclase, chloroplastic; AltName: Full=Protein LUTEIN DEFICIENT 2; Flags: Precursor && PF05834:Lycopene cyclase protein
	LOC110662928	1.96757	2.03639	3.40005	2.19422	zeaxanthin epoxidase%2C chloroplastic && O81360.1 RecName: Full=Zeaxanthin epoxidase, chloroplastic; AltName: Full=PA-ZE; Flags: Precursor && PF01494:FAD binding domain|PF00498:FHA domain
	LOC110648761	0.20818	0.107905	0	0	carotenoid cleavage dioxygenase 8 homolog B%2C chloroplastic && Q8LIY8.1 RecName: Full=Carotenoid cleavage dioxygenase 8 homolog B, chloroplastic; Short=OsCCD8b; AltName: Full=Protein DWARF-10; AltName: Full=Protein MAX4 homolog; Flags: Precursor && PF03055:Retinal pigment epithelial membrane protein
	LOC110641462	0.126497	0.0241388	0.0155523	0.00343641	indole-3-acetaldehyde oxidase-like%2C transcript variant X3 && Q7G193.2 RecName: Full=Indole-3-acetaldehyde oxidase; Short=IAA oxidase; AltName: Full=Aldehyde oxidase 1; Short=AO-1; Short=AtAO-1; Short=AtAO1 && PF00111:2Fe-2S iron-sulfur cluster binding domain|PF03450:CO dehydrogenase flavoprotein C-terminal domain|PF01315:Aldehyde oxidase and xanthine dehydrogenase, a/b hammerhead domain|PF01799…
	LOC110656752	9.51504	6.81601	13.4587	9.06176	zeta-carotene desaturase%2C chloroplastic/chromoplastic-like && Q9FV46.1 RecName: Full=Zeta-carotene desaturase, chloroplastic/chromoplastic; AltName: Full=9,9'-di-cis-zeta-carotene desaturase; AltName: Full=Carotene 7,8-desaturase; Flags: Precursor && PF01593:Flavin containing amine oxidoreductase
	LOC110638127	0.299211	0.103471	0.791372	0.0422266	9-cis-epoxycarotenoid dioxygenase NCED3%2C chloroplastic-like && Q9LRR7.1 RecName: Full=9-cis-epoxycarotenoid dioxygenase NCED3, chloroplastic; Short=AtNCED3; AltName: Full=Protein SALT TOLERANT 1; Flags: Precursor && PF03055:Retinal pigment epithelial membrane protein
	LOC110673753	0.0869108	0.012254	0.238739	0.105521	indole-3-acetaldehyde oxidase-like%2C transcript variant X1 && Q7G193.2 RecName: Full=Indole-3-acetaldehyde oxidase; Short=IAA oxidase; AltName: Full=Aldehyde oxidase 1; Short=AO-1; Short=AtAO-1; Short=AtAO1 && PF02738:Molybdopterin-binding domain of aldehyde dehydrogenase|PF01315:Aldehyde oxidase and xanthine dehydrogenase, a/b hammerhead domain|PF00941:FAD binding domain in molybdopterin dehydr…
	LOC110632161	6.20825	6.95171	3.81999	5.40792	15-cis-zeta-carotene isomerase%2C chloroplastic && Q9SAC0.1 RecName: Full=15-cis-zeta-carotene isomerase, chloroplastic; Flags: Precursor && PF07298:NnrU protein
	LOC110669315	0.818523	0.488519	1.45248	1.01512	zeaxanthin epoxidase%2C chloroplastic-like%2C transcript variant X1 && C3VEQ2.1 RecName: Full=Zeaxanthin epoxidase, chloroplastic; Short=OgZEP; Flags: Precursor && PF01494:FAD binding domain
	LOC110658181	0.500277	0.314649	1.26676	7.49431	beta-carotene hydroxylase 2%2C chloroplastic-like && O49814.1 RecName: Full=Beta-carotene hydroxylase 2, chloroplastic; Flags: Precursor && PF04116:Fatty acid hydroxylase superfamily
	LOC110664739	8.0349	8.00817	13.2758	8.82681	lycopene beta cyclase%2C chloroplastic/chromoplastic%2C transcript variant X2 && Q43503.1 RecName: Full=Lycopene beta cyclase, chloroplastic; Flags: Precursor && PF05834:Lycopene cyclase protein
Diterpenoid	LOC110652612	1.04152	0.101942	0	0.0100009	ent-kaurenoic acid oxidase 2-like%2C transcript variant X2 && Q9C5Y2.2 RecName: Full=Ent-kaurenoic acid oxidase 2; Short=AtKAO2; AltName: Full=Cytochrome P450 88A4 && PF00067:Cytochrome P450
	LOC110667076	2.69737	2.3805	0.195807	0.341715	ent-kaur-16-ene synthase%2C chloroplastic%2C transcript variant X1 && Q39548.1 RecName: Full=Ent-kaur-16-ene synthase, chloroplastic; AltName: Full=Ent-kaurene synthase; AltName: Full=Ent-kaurene synthase B; Short=KSB; Flags: Precursor && PF03936:Terpene synthase family, metal binding domain|PF01397:Terpene synthase, N-terminal domain
	LOC110636133	2.47764	2.54887	0.327227	1.71635	ent-kaurene oxidase%2C chloroplastic-like%2C transcript variant X2 && Q93ZB2.2 RecName: Full=Ent-kaurene oxidase, chloroplastic; Short=AtKO1; AltName: Full=Cytochrome P450 701A3 && PF00067:Cytochrome P450
	LOC110664416	0.720668	0.184788	0.0273451	0.0676111	gibberellin 20 oxidase 1-like && Q39110.2 RecName: Full=Gibberellin 20 oxidase 1; AltName: Full=GA 20-oxidase 1; Short=AtGA20ox1; AltName: Full=Gibberellin C-20 oxidase 1 && PF03171:2OG-Fe(II) oxygenase superfamily|PF14226:non-haem dioxygenase in morphine synthesis N-terminal
	LOC110672862	0.0884188	0.0783857	0.647476	0	ent-kaur-16-ene synthase%2C chloroplastic-like%2C transcript variant X1 && Q0JA82.1 RecName: Full=Ent-kaur-16-ene synthase, chloroplastic; AltName: Full=Ent-kaurene synthase B; AltName: Full=Kaurene synthase 1; Short=OsKS1; Flags: Precursor && PF03936:Terpene synthase family, metal binding domain|PF01397:Terpene synthase, N-terminal domain
	LOC110646746	0	0	0.181988	0	ent-kaur-16-ene synthase%2C chloroplastic-like%2C transcript variant X1 && Q39548.1 RecName: Full=Ent-kaur-16-ene synthase, chloroplastic; AltName: Full=Ent-kaurene synthase; AltName: Full=Ent-kaurene synthase B; Short=KSB; Flags: Precursor && PF01397:Terpene synthase, N-terminal domain|PF03936:Terpene synthase family, metal binding domain
	LOC110640195	0.197977	0.0176571	0	0	ent-kaurenoic acid oxidase 2-like%2C transcript variant X3 && Q9C5Y2.2 RecName: Full=Ent-kaurenoic acid oxidase 2; Short=AtKAO2; AltName: Full=Cytochrome P450 88A4 && PF00067:Cytochrome P450
	LOC110661628	0.216969	0.0241689	0	0.0120582	gibberellin 3-beta-dioxygenase 1-like && O24648.1 RecName: Full=Gibberellin 3-beta-dioxygenase 1; AltName: Full=GA 3-oxidase 1; AltName: Full=Gibberellin 3 beta-hydroxylase 1 && PF03171:2OG-Fe(II) oxygenase superfamily|PF14226:non-haem dioxygenase in morphine synthesis N-terminal
	LOC110673668	0.018428	0	0.162785	0.175999	ent-kaurenoic acid oxidase 1-like%2C transcript variant X2 && O23051.1 RecName: Full=Ent-kaurenoic acid oxidase 1; Short=AtKAO1; AltName: Full=Cytochrome P450 88A3 && PF00067:Cytochrome P450
Zeatin	LOC110652438	0	0.422502	0	0.219864	- && Q9C5J6.1 RecName: Full=tRNA dimethylallyltransferase 9; AltName: Full=Isopentenyl-diphosphate: tRNA isopentenyltransferase 9; Short=AtIPT9; Short=IPP transferase 9; Short=IPPT 9 && PF01715:IPP transferase
	LOC110666594	1.36614	0.667969	1.22119	1.18437	cytokinin dehydrogenase 6-like && Q9LY71.2 RecName: Full=Cytokinin dehydrogenase 6; AltName: Full=Cytokinin oxidase 6; Short=AtCKX6; Short=AtCKX7; Short=CKO6; Flags: Precursor && PF01565:FAD binding domain|PF09265:Cytokinin dehydrogenase 1, FAD and cytokinin binding
	LOC110633791	164.701	97.9547	6.91389	139.777	zeatin O-glucosyltransferase-like && Q9ZSK5.1 RecName: Full=Zeatin O-glucosyltransferase; AltName: Full=Trans-zeatin O-beta-D-glucosyltransferase && PF00201:UDP-glucoronosyl and UDP-glucosyl transferase
	LOC110662237	0.426253	0.106538	0.00943293	0.00964017	cytokinin dehydrogenase 7-like && Q9FUJ1.1 RecName: Full=Cytokinin dehydrogenase 7; AltName: Full=Cytokinin oxidase 7; Short=AtCKX5; Short=AtCKX7; Short=CKO7 && PF09265:Cytokinin dehydrogenase 1, FAD and cytokinin binding|PF01565:FAD binding domain
	LOC110648793	5.953	6.13683	3.13996	7.48309	tRNA dimethylallyltransferase 2 && Q9ZUX7.2 RecName: Full=tRNA dimethylallyltransferase 2; AltName: Full=Isopentenyl-diphosphate: tRNA isopentenyltransferase 2; Short=AtIPT2; Short=IPP transferase 2; Short=IPPT 2 && PF01715:IPP transferase
	LOC110632633	0.448697	0.571624	0.0678338	3.32508	cytokinin dehydrogenase 5-like && Q67YU0.1 RecName: Full=Cytokinin dehydrogenase 5; AltName: Full=Cytokinin oxidase 5; Short=AtCKX5; Short=AtCKX6; Short=CKO5; Flags: Precursor && PF09265:Cytokinin dehydrogenase 1, FAD and cytokinin binding|PF01565:FAD binding domain
	LOC110662014	0.00898929	0.00919913	0.191908	0.0406024	cytokinin dehydrogenase 3-like && Q9LTS3.1 RecName: Full=Cytokinin dehydrogenase 3; AltName: Full=Cytokinin oxidase 3; Short=AtCKX3; Short=CKO 3; Flags: Precursor && PF09265:Cytokinin dehydrogenase 1, FAD and cytokinin binding|PF01565:FAD binding domain
	LOC110648281	1.77637	1.55921	2.37488	1.01281	tRNA dimethylallyltransferase 9-like%2C transcript variant X2 && Q9C5J6.1 RecName: Full=tRNA dimethylallyltransferase 9; AltName: Full=Isopentenyl-diphosphate: tRNA isopentenyltransferase 9; Short=AtIPT9; Short=IPP transferase 9; Short=IPPT 9 && PF01715:IPP transferase
N-glaycan biosynthesis	LOC110655035	5.05805	39.1584	11.2722	45.6105	lipid phosphate phosphatase gamma-like && Q6NLA5.1 RecName: Full=Lipid phosphate phosphatase gamma, chloroplastic; Short=AtLPPG; AltName: Full=Phosphatidic acid phosphatase gamma; AltName: Full=Plastidic phosphatidic acid phosphatase gamma; Flags: Precursor && PF01569:PAP2 superfamily
	LOC110639205	0.769737	17.8429	9.947	13.4888	dolichol-phosphate mannose synthase subunit 3-like%2C transcript variant X3 && - && PF08285:Dolichol-phosphate mannosyltransferase subunit 3 (DPM3)
	LOC110670322	17.1402	6.91717	12.6286	10.9355	alpha-1%2C3/1%2C6-mannosyltransferase ALG2-like && O94738.1 RecName: Full=Alpha-1,3/1,6-mannosyltransferase ALG2; AltName: Full=GDP-Man:Man(1)GlcNAc(2)-PP-Dol alpha-1,3-mannosyltransferase; AltName: Full=GDP-Man:Man(1)GlcNAc(2)-PP-dolichol mannosyltransferase; AltName: Full=GDP-Man:Man(2)GlcNAc(2)-PP-Dol alpha-1,6-mannosyltransferase && PF00534:Glycosyl transferases group 1|PF13579:Glycosyl trans…
	LOC110670382	2.02634	5.40347	3.61865	11.9599	dol-P-Man:Man(6)GlcNAc(2)-PP-Dol alpha-1%2C2-mannosyltransferase-like && Q9FZ49.1 RecName: Full=Dol-P-Man:Man(6)GlcNAc(2)-PP-Dol alpha-1,2-mannosyltransferase; AltName: Full=Alpha-1,2-mannosyltransferase ALG9; AltName: Full=Asparagine-linked glycosylation protein 9; AltName: Full=Dol-P-Man:Man(8)GlcNAc(2)-PP-Dol alpha-1,2-mannosyltransferase && PF03901:Alg9-like mannosyltransferase family
	LOC110665096	5.883	10.8424	0.983409	3.44204	dolichyl-diphosphooligosaccharide--protein glycosyltransferase 48 kDa subunit-like && Q944K2.1 RecName: Full=Dolichyl-diphosphooligosaccharide--protein glycosyltransferase 48 kDa subunit; Short=Oligosaccharyl transferase 48 kDa subunit; AltName: Full=Protein DEFECTIVE GLYCOSYLATION 1; Flags: Precursor && PF03345:Oligosaccharyltransferase 48 kDa subunit beta
	LOC110661820	0.976424	0.392943	0.986073	0.651445	- && Q93Y37.1 RecName: Full=Mannosyl-oligosaccharide 1,2-alpha-mannosidase MNS3 && PF01532:Glycosyl hydrolase family 47
	LOC110646828	23.6443	35.0458	19.5727	46.1534	dolichol kinase EVAN%2C transcript variant X1 && F4J4C8.1 RecName: Full=Dolichol kinase EVAN && -
	LOC110633956	3.34209	6.69584	4.76715	10.9806	dol-P-Man:Man(6)GlcNAc(2)-PP-Dol alpha-1%2C2-mannosyltransferase-like%2C transcript variant X2 && Q9FZ49.1 RecName: Full=Dol-P-Man:Man(6)GlcNAc(2)-PP-Dol alpha-1,2-mannosyltransferase; AltName: Full=Alpha-1,2-mannosyltransferase ALG9; AltName: Full=Asparagine-linked glycosylation protein 9; AltName: Full=Dol-P-Man:Man(8)GlcNAc(2)-PP-Dol alpha-1,2-mannosyltransferase && PF03901:Alg9-like mannosylt…
	LOC110660934	8.34069	13.3422	4.07479	9.8211	dol-P-Man:Man(5)GlcNAc(2)-PP-Dol alpha-1%2C3-mannosyltransferase && O82244.1 RecName: Full=Dol-P-Man:Man(5)GlcNAc(2)-PP-Dol alpha-1,3-mannosyltransferase; AltName: Full=Alpha-1,3-mannosyltransferase ALG3; AltName: Full=Asparagine-linked glycosylation protein 3; Short=AtALG3; AltName: Full=Not56-like protein && PF05208:ALG3 protein
	LOC110632212	76.3677	118.527	60.6121	164.519	lipid phosphate phosphatase gamma-like && Q6NLA5.1 RecName: Full=Lipid phosphate phosphatase gamma, chloroplastic; Short=AtLPPG; AltName: Full=Phosphatidic acid phosphatase gamma; AltName: Full=Plastidic phosphatidic acid phosphatase gamma; Flags: Precursor && PF01569:PAP2 superfamily
	LOC110663558	2.6577	3.16498	9.45934	3.422	lipid phosphate phosphatase epsilon 2%2C chloroplastic-like%2C transcript variant X3 && Q6NQL6.1 RecName: Full=Lipid phosphate phosphatase epsilon 2, chloroplastic; Short=AtLPPE2; AltName: Full=Phosphatidic acid phosphatase epsilon 2; AltName: Full=Plastidic phosphatidic acid phosphatase epsilon 2; Flags: Precursor && PF01569:PAP2 superfamily
	LOC110636629	44.874	49.52	15.5293	30.7188	probable dolichyl-diphosphooligosaccharide--protein glycosyltransferase subunit 3B && Q9SYB5.1 RecName: Full=Probable dolichyl-diphosphooligosaccharide--protein glycosyltransferase subunit 3B; Flags: Precursor && PF04756:OST3 / OST6 family
	LOC110659860	6.70834	10.3741	1.85903	4.90847	dolichyl-diphosphooligosaccharide--protein glycosyltransferase subunit STT3B%2C transcript variant X2 && Q9FX21.1 RecName: Full=Dolichyl-diphosphooligosaccharide--protein glycosyltransferase subunit STT3B; Short=Oligosaccharyl transferase subunit STT3B; Short=STT3-B; AltName: Full=Protein STAUROSPORIN AND TEMPERATURE SENSITIVE 3-LIKE B && PF02516:Oligosaccharyl transferase STT3 subunit
	LOC110663562	89.0781	71.2909	39.2761	184.945	lipid phosphate phosphatase epsilon 2%2C chloroplastic-like && Q6NQL6.1 RecName: Full=Lipid phosphate phosphatase epsilon 2, chloroplastic; Short=AtLPPE2; AltName: Full=Phosphatidic acid phosphatase epsilon 2; AltName: Full=Plastidic phosphatidic acid phosphatase epsilon 2; Flags: Precursor && PF01569:PAP2 superfamily
	LOC110641257	5.78809	9.5844	2.14384	7.15335	alpha-mannosidase 2-like && Q9LFR0.1 RecName: Full=Alpha-mannosidase 2; AltName: Full=Golgi alpha-mannosidase II; Short=AMan II; Short=AtGMII; Short=Man II; AltName: Full=Protein hybrid glycosylation 1 && PF09261:Alpha mannosidase, middle domain|PF07748:Glycosyl hydrolases family 38 C-terminal domain|PF01074:Glycosyl hydrolases family 38 N-terminal domain
	LOC110668339	5.8997	5.89181	1.9658	4.85143	alpha-1%2C6-mannosyl-glycoprotein 2-beta-N-acetylglucosaminyltransferase && O19071.1 RecName: Full=Alpha-1,6-mannosyl-glycoprotein 2-beta-N-acetylglucosaminyltransferase; AltName: Full=Beta-1,2-N-acetylglucosaminyltransferase II; AltName: Full=GlcNAc-T II; Short=GNT-II; AltName: Full=Mannoside acetylglucosaminyltransferase 2; AltName: Full=N-glycosyl-oligosaccharide-glycoprotein N-acetylglucosami…
	LOC110632889	17.4206	15.6362	6.6004	9.84232	mannosyl-oligosaccharide 1%2C2-alpha-mannosidase MNS1-like && Q9C512.1 RecName: Full=Mannosyl-oligosaccharide 1,2-alpha-mannosidase MNS1; Short=AtMANIb; AltName: Full=Alpha-mannosidase IB && PF01532:Glycosyl hydrolase family 47
	LOC110642091	940.414	929.012	468.184	1103.48	dolichyl-phosphate beta-glucosyltransferase-like%2C transcript variant X2 && Q9DB25.1 RecName: Full=Dolichyl-phosphate beta-glucosyltransferase; Short=DolP-glucosyltransferase; AltName: Full=Asparagine-linked glycosylation protein 5 homolog && PF00535:Glycosyl transferase family 2
	LOC110672196	9.86855	10.0555	4.20887	7.93982	alpha-1%2C3-mannosyl-glycoprotein 2-beta-N-acetylglucosaminyltransferase && Q9XGM8.1 RecName: Full=Alpha-1,3-mannosyl-glycoprotein 2-beta-N-acetylglucosaminyltransferase; AltName: Full=N-acetylglucosaminyltransferase I; Short=GlcNAcT-I; AltName: Full=N-glycosyl-oligosaccharide-glycoprotein N-acetylglucosaminyltransferase I; AltName: Full=Protein COMPLEX GLYCAN LESS 1 && PF03071:GNT-I family
	LOC110648539	23.7533	29.9855	8.32515	16.187	dolichyl-diphosphooligosaccharide--protein glycosyltransferase subunit 2-like && Q93Z16.1 RecName: Full=Dolichyl-diphosphooligosaccharide--protein glycosyltransferase subunit 2; AltName: Full=Protein HAPLESS 6; AltName: Full=Ribophorin II; Short=RPN-II; AltName: Full=Ribophorin-2; Flags: Precursor && PF05817:Oligosaccharyltransferase subunit Ribophorin II
	LOC110656001	3.77137	6.92634	9.93959	10.0331	polyprenol reductase 2-like%2C transcript variant X2 && Q9SI62.2 RecName: Full=Polyprenol reductase 2 && PF02544:3-oxo-5-alpha-steroid 4-dehydrogenase
	LOC110669263	0.395904	0.0717187	0	0.00900036	dolichyl-diphosphooligosaccharide--protein glycosyltransferase subunit 1A-like && Q9SFX3.1 RecName: Full=Dolichyl-diphosphooligosaccharide--protein glycosyltransferase subunit 1A; AltName: Full=Ribophorin IA; Short=RPN-IA; AltName: Full=Ribophorin-1A; Flags: Precursor && PF04597:Ribophorin I
	LOC110645354	16.8675	19.1678	39.9692	41.7614	lipid phosphate phosphatase epsilon 2%2C chloroplastic-like && Q6NQL6.1 RecName: Full=Lipid phosphate phosphatase epsilon 2, chloroplastic; Short=AtLPPE2; AltName: Full=Phosphatidic acid phosphatase epsilon 2; AltName: Full=Plastidic phosphatidic acid phosphatase epsilon 2; Flags: Precursor && PF01569:PAP2 superfamily
	LOC110635796	10.7906	9.93848	5.44354	12.4208	probable dolichyl pyrophosphate Glc1Man9GlcNAc2 alpha-1%2C3-glucosyltransferase%2C transcript variant X4 && O80505.3 RecName: Full=Probable dolichyl pyrophosphate Glc1Man9GlcNAc2 alpha-1,3-glucosyltransferase; AltName: Full=Asparagine-linked glycosylation protein 8 homolog; AltName: Full=Dol-P-Glc:Glc(1)Man(9)GlcNAc(2)-PP-dolichyl alpha-1,3-glucosyltransferase; AltName: Full=Dolichyl-P-Glc:Glc1Ma…
	LOC110640097	26.7095	35.1026	12.1471	18.6212	dolichyl-diphosphooligosaccharide--protein glycosyltransferase 48 kDa subunit-like && Q944K2.1 RecName: Full=Dolichyl-diphosphooligosaccharide--protein glycosyltransferase 48 kDa subunit; Short=Oligosaccharyl transferase 48 kDa subunit; AltName: Full=Protein DEFECTIVE GLYCOSYLATION 1; Flags: Precursor && PF03345:Oligosaccharyltransferase 48 kDa subunit beta
	LOC110647405	13.4681	10.6313	6.39794	8.09305	UDP-glycosyltransferase TURAN && Q8L7M0.1 RecName: Full=UDP-glycosyltransferase TURAN && PF13579:Glycosyl transferase 4-like domain|PF13692:Glycosyl transferases group 1
	LOC110654833	20.7576	20.3936	8.63255	24.5268	alpha-mannosidase 2-like && Q9LFR0.1 RecName: Full=Alpha-mannosidase 2; AltName: Full=Golgi alpha-mannosidase II; Short=AMan II; Short=AtGMII; Short=Man II; AltName: Full=Protein hybrid glycosylation 1 && PF07748:Glycosyl hydrolases family 38 C-terminal domain|PF09261:Alpha mannosidase, middle domain|PF01074:Glycosyl hydrolases family 38 N-terminal domain
	LOC110663693	15.3014	20.5139	6.93071	21.3802	dolichyl-diphosphooligosaccharide--protein glycosyltransferase subunit STT3B-like%2C transcript variant X2 && Q9FX21.1 RecName: Full=Dolichyl-diphosphooligosaccharide--protein glycosyltransferase subunit STT3B; Short=Oligosaccharyl transferase subunit STT3B; Short=STT3-B; AltName: Full=Protein STAUROSPORIN AND TEMPERATURE SENSITIVE 3-LIKE B && PF02516:Oligosaccharyl transferase STT3 subunit
	LOC110671826	14.868	10.0463	27.9667	13.8927	UDP-N-acetylglucosamine transferase subunit ALG13 homolog%2C transcript variant X1 && Q5I0K7.1 RecName: Full=UDP-N-acetylglucosamine transferase subunit ALG13 homolog; AltName: Full=Glycosyltransferase 28 domain-containing protein 1 && PF04101:Glycosyltransferase family 28 C-terminal domain
	LOC110670352	3.15349	3.32926	6.40759	3.88534	- && O94738.1 RecName: Full=Alpha-1,3/1,6-mannosyltransferase ALG2; AltName: Full=GDP-Man:Man(1)GlcNAc(2)-PP-Dol alpha-1,3-mannosyltransferase; AltName: Full=GDP-Man:Man(1)GlcNAc(2)-PP-dolichol mannosyltransferase; AltName: Full=GDP-Man:Man(2)GlcNAc(2)-PP
	LOC110641775	8.6449	10.4059	4.01928	7.14613	dolichyl-diphosphooligosaccharide--protein glycosyltransferase subunit STT3A-like%2C transcript variant X1 && Q93ZY3.1 RecName: Full=Dolichyl-diphosphooligosaccharide--protein glycosyltransferase subunit STT3A; Short=Oligosaccharyl transferase subunit STT3A; Short=STT3-A; AltName: Full=Integral membrane protein 1; AltName: Full=Protein STAUROSPORIN AND TEMPERATURE SENSITIVE 3-LIKE A && PF02516:Ol…
	LOC110640662	44.1018	52.6254	23.9589	32.9509	probable glucan 1%2C3-alpha-glucosidase && Q9FN05.1 RecName: Full=Probable glucan 1,3-alpha-glucosidase; AltName: Full=Glucosidase II subunit alpha; AltName: Full=Protein PRIORITY IN SWEET LIFE 5; AltName: Full=Protein RADIAL SWELLING 3; Flags: Precursor && PF01055:Glycosyl hydrolases family 31|PF13802:Galactose mutarotase-like
	LOC110640851	0.437663	0.283638	0	0.0311252	UDP-N-acetylglucosamine transferase subunit ALG13 homolog && Q5I0K7.1 RecName: Full=UDP-N-acetylglucosamine transferase subunit ALG13 homolog; AltName: Full=Glycosyltransferase 28 domain-containing protein 1 && PF04101:Glycosyltransferase family 28 C-terminal domain
	LOC110654418	12.2415	13.7192	4.77514	9.22511	dolichyl-diphosphooligosaccharide--protein glycosyltransferase subunit 1A-like && Q9SFX3.1 RecName: Full=Dolichyl-diphosphooligosaccharide--protein glycosyltransferase subunit 1A; AltName: Full=Ribophorin IA; Short=RPN-IA; AltName: Full=Ribophorin-1A; Flags: Precursor && PF04597:Ribophorin I
	LOC110636377	11.6577	16.7109	4.38604	14.0347	dolichyl-diphosphooligosaccharide--protein glycosyltransferase subunit STT3A && Q93ZY3.1 RecName: Full=Dolichyl-diphosphooligosaccharide--protein glycosyltransferase subunit STT3A; Short=Oligosaccharyl transferase subunit STT3A; Short=STT3-A; AltName: Full=Integral membrane protein 1; AltName: Full=Protein STAUROSPORIN AND TEMPERATURE SENSITIVE 3-LIKE A && PF02516:Oligosaccharyl transferase STT3 …
	LOC110636264	1.72733	1.23679	4.47448	1.94325	dolichol-phosphate mannose synthase subunit 3-like%2C transcript variant X3 && - && PF08285:Dolichol-phosphate mannosyltransferase subunit 3 (DPM3)
	LOC110654272	8.04279	8.02708	2.99637	3.22375	dolichyl-diphosphooligosaccharide--protein glycosyltransferase subunit 2%2C transcript variant X2 && Q93Z16.1 RecName: Full=Dolichyl-diphosphooligosaccharide--protein glycosyltransferase subunit 2; AltName: Full=Protein HAPLESS 6; AltName: Full=Ribophorin II; Short=RPN-II; AltName: Full=Ribophorin-2; Flags: Precursor && PF05817:Oligosaccharyltransferase subunit Ribophorin II
	LOC110648531	1.50342	1.53869	0.550855	1.11619	uncharacterized LOC110648531%2C transcript variant X2 && - && PF04724:Glycosyltransferase family 17
	LOC110633209	13.5776	17.0109	6.11454	9.37438	probable dolichyl-diphosphooligosaccharide--protein glycosyltransferase subunit 3B && Q9SYB5.1 RecName: Full=Probable dolichyl-diphosphooligosaccharide--protein glycosyltransferase subunit 3B; Flags: Precursor && PF04756:OST3 / OST6 family
	LOC110647553	11.3134	14.3259	5.92742	7.69309	dolichyl-diphosphooligosaccharide--protein glycosyltransferase subunit 1B-like && Q9ZUA0.1 RecName: Full=Dolichyl-diphosphooligosaccharide--protein glycosyltransferase subunit 1B; AltName: Full=Ribophorin IB; Short=RPN-IB; AltName: Full=Ribophorin-1B; Flags: Precursor && PF04597:Ribophorin I
	LOC110664091	6.21646	6.76828	3.02831	5.08726	mannosyl-oligosaccharide 1%2C2-alpha-mannosidase MNS1-like%2C transcript variant X1 && Q9C512.1 RecName: Full=Mannosyl-oligosaccharide 1,2-alpha-mannosidase MNS1; Short=AtMANIb; AltName: Full=Alpha-mannosidase IB && PF01532:Glycosyl hydrolase family 47
	LOC110647717	3.27679	2.99862	1.42738	3.05857	GDP-Man:Man(3)GlcNAc(2)-PP-Dol alpha-1%2C2-mannosyltransferase-like && Q9XEE9.2 RecName: Full=GDP-Man:Man(3)GlcNAc(2)-PP-Dol alpha-1,2-mannosyltransferase; AltName: Full=Alpha-1,2-mannosyltransferase ALG11; AltName: Full=Asparagine-linked glycosylation protein 11; AltName: Full=Protein LEAF WILTING 3 && PF15924:ALG11 mannosyltransferase N-terminus
	LOC110652108	42.0949	50.3118	24.9183	87.0386	dolichyl-phosphate beta-glucosyltransferase-like && Q9Y673.1 RecName: Full=Dolichyl-phosphate beta-glucosyltransferase; Short=DolP-glucosyltransferase; AltName: Full=Asparagine-linked glycosylation protein 5 homolog && PF00535:Glycosyl transferase family 2
	LOC110661109	4.51496	5.16695	2.64044	3.15564	probable dolichyl pyrophosphate Man9GlcNAc2 alpha-1%2C3-glucosyltransferase && Q9FF17.1 RecName: Full=Probable dolichyl pyrophosphate Man9GlcNAc2 alpha-1,3-glucosyltransferase; AltName: Full=Asparagine-linked glycosylation protein 6 homolog; AltName: Full=Dol-P-Glc:Man(9)GlcNAc(2)-PP-Dol alpha-1,3-glucosyltransferase; AltName: Full=Dolichyl-P-Glc:Man9GlcNAc2-PP-dolichyl glucosyltransferase && PF0…
	LOC110661586	16.4929	17.0446	26.0092	8.74726	dolichol-phosphate mannose synthase subunit 2%2C transcript variant X1 && Q9Z324.3 RecName: Full=Dolichol phosphate-mannose biosynthesis regulatory protein; AltName: Full=Dolichol-phosphate mannose synthase subunit 2; Short=DPM synthase subunit 2 && PF07297:Dolichol phosphate-mannose biosynthesis regulatory protein (DPM2)
	LOC110669984	169.466	173.772	112.53	132.376	dolichyl-diphosphooligosaccharide--protein glycosyltransferase 48 kDa subunit-like && Q944K2.1 RecName: Full=Dolichyl-diphosphooligosaccharide--protein glycosyltransferase 48 kDa subunit; Short=Oligosaccharyl transferase 48 kDa subunit; AltName: Full=Protein DEFECTIVE GLYCOSYLATION 1; Flags: Precursor && PF03345:Oligosaccharyltransferase 48 kDa subunit beta
	LOC110671077	41.64	39.5979	37.5444	18.6175	dolichyl-diphosphooligosaccharide--protein glycosyltransferase subunit DAD1-like && Q9ZWQ7.1 RecName: Full=Dolichyl-diphosphooligosaccharide--protein glycosyltransferase subunit DAD1; Short=Oligosaccharyl transferase subunit DAD1; AltName: Full=CitDAD-1-1; AltName: Full=Defender against cell death 1; Short=DAD-1 && PF02109:DAD family
	LOC110653479	33.4114	39.4211	32.4822	61.2712	UDP-N-acetylglucosamine--dolichyl-phosphate N-acetylglucosaminephosphotransferase-like%2C transcript variant X2 && P0CD61.1 RecName: Full=UDP-N-acetylglucosamine--dolichyl-phosphate N-acetylglucosaminephosphotransferase; AltName: Full=GlcNAc-1-P transferase; Short=G1PT; Short=GPT; AltName: Full=N-acetylglucosamine-1-phosphate transferase && PF00953:Glycosyl transferase family 4
	LOC110671298	3.98092	4.54214	4.32237	7.37481	alpha-1%2C3/1%2C6-mannosyltransferase ALG2-like%2C transcript variant X2 && Q7KWM5.1 RecName: Full=Alpha-1,3/1,6-mannosyltransferase ALG2; AltName: Full=Asparagine-linked glycosylation protein 2 homolog; AltName: Full=GDP-Man:Man(1)GlcNAc(2)-PP-Dol alpha-1,3-mannosyltransferase; AltName: Full=GDP-Man:Man(1)GlcNAc(2)-PP-dolichol mannosyltransferase; AltName: Full=GDP-Man:Man(2)GlcNAc(2)-PP-Dol alp…
	LOC110650904	3.20829	5.69169	2.40088	4.12647	UDP-N-acetylglucosamine--dolichyl-phosphate N-acetylglucosaminephosphotransferase && P0CD61.1 RecName: Full=UDP-N-acetylglucosamine--dolichyl-phosphate N-acetylglucosaminephosphotransferase; AltName: Full=GlcNAc-1-P transferase; Short=G1PT; Short=GPT; AltName: Full=N-acetylglucosamine-1-phosphate transferase && PF00953:Glycosyl transferase family 4
	LOC110647716	7.72167	10.6006	4.84423	6.82373	GDP-Man:Man(3)GlcNAc(2)-PP-Dol alpha-1%2C2-mannosyltransferase && Q9XEE9.2 RecName: Full=GDP-Man:Man(3)GlcNAc(2)-PP-Dol alpha-1,2-mannosyltransferase; AltName: Full=Alpha-1,2-mannosyltransferase ALG11; AltName: Full=Asparagine-linked glycosylation protein 11; AltName: Full=Protein LEAF WILTING 3 && PF00534:Glycosyl transferases group 1|PF15924:ALG11 mannosyltransferase N-terminus
	LOC110647756	6.33204	7.21195	3.99424	3.9157	uncharacterized LOC110647756 && - && PF04724:Glycosyltransferase family 17
	LOC110632867	4.27314	2.3839	5.14445	4.8568	- && Q8L638.1 RecName: Full=Dol-P-Glc:Glc(2)Man(9)GlcNAc(2)-PP-Dol alpha-1,2-glucosyltransferase; AltName: Full=Alpha-1,2-glucosyltransferase ALG10 homolog; AltName: Full=Protein HOMOLOG OF YEAST ALG10 && PF04922:DIE2/ALG10 family
	LOC110670010	15.6641	18.7168	11.1876	11.122	dolichyl-diphosphooligosaccharide--protein glycosyltransferase subunit 1B-like && Q9ZUA0.1 RecName: Full=Dolichyl-diphosphooligosaccharide--protein glycosyltransferase subunit 1B; AltName: Full=Ribophorin IB; Short=RPN-IB; AltName: Full=Ribophorin-1B; Flags: Precursor && PF04597:Ribophorin I
	LOC110639534	3.10227	3.29182	1.87406	1.8003	uncharacterized LOC110639534 && - && PF04724:Glycosyltransferase family 17
	LOC110670335	4.7834	3.82167	5.65841	6.51775	alpha-1%2C3/1%2C6-mannosyltransferase ALG2-like%2C transcript variant X2 && Q7KWM5.1 RecName: Full=Alpha-1,3/1,6-mannosyltransferase ALG2; AltName: Full=Asparagine-linked glycosylation protein 2 homolog; AltName: Full=GDP-Man:Man(1)GlcNAc(2)-PP-Dol alpha-1,3-mannosyltransferase; AltName: Full=GDP-Man:Man(1)GlcNAc(2)-PP-dolichol mannosyltransferase; AltName: Full=GDP-Man:Man(2)GlcNAc(2)-PP-Dol alp…
	LOC110649341	0.848515	0.665906	0.948867	1.94316	uncharacterized LOC110649341%2C transcript variant X2 && Q9SI62.2 RecName: Full=Polyprenol reductase 2 && PF02544:3-oxo-5-alpha-steroid 4-dehydrogenase
	LOC110635799	12.9071	13.0527	10.7447	17.7837	dol-P-Man:Man(7)GlcNAc(2)-PP-Dol alpha-1%2C6-mannosyltransferase%2C transcript variant X2 && A8MR93.1 RecName: Full=Dol-P-Man:Man(7)GlcNAc(2)-PP-Dol alpha-1,6-mannosyltransferase; AltName: Full=Alpha-1,6-mannosyltransferase ALG12; AltName: Full=Asparagine-linked glycosylation protein 12; AltName: Full=EMS-mutagenized BRI1 suppressor 4 && PF03901:Alg9-like mannosyltransferase family
	LOC110651587	5.39784	5.07166	3.4968	5.67668	mannosyl-oligosaccharide 1%2C2-alpha-mannosidase MNS3-like%2C transcript variant X1 && Q93Y37.1 RecName: Full=Mannosyl-oligosaccharide 1,2-alpha-mannosidase MNS3 && PF01532:Glycosyl hydrolase family 47
	LOC110635648	2.40792	3.21266	2.52153	4.54519	beta-1%2C4-mannosyl-glycoprotein 4-beta-N-acetylglucosaminyltransferase-like%2C transcript variant X4 && - && PF04724:Glycosyltransferase family 17
