# Supplementary material for: Comparative analysis of latex transcriptomes reveals the potential mechanisms underlying rubber molecular weight variations between the Hevea brasiliensis clones RRIM600 and Reyan7-33–97
Source: BMC Plant Biol. 2021 May 29;21:244. doi: 10.1186/s12870-021-03022-5 (PMC8164328; doi:10.1186/s12870-021-03022-5)
Supplement: Supplementary file 5 — Table S5. Differentially expressed rubber particle associated proteins among four H. brasiliensis latex samples. [file 12870_2021_3022_MOESM5_ESM.xlsx]

## Sheet: Table S5
Comparative analysis of latex transcriptomes reveals the potential mechanisms underlying the rubber molecular weight variations among Hevea brasiliensis clones RRIM600 and Reyan7-33-97 Shichao Xin, Yuwei Hua, Ji Li, Xuemei Dai, Xianfeng Yang, Jinu Udayabhanu, Huasun Huang* and Tiandai Huang*
Table S5. Differentially expressed rubber particle associated proteins among four H. brasiliensis latex samples.
	gene_id	Reyan73397y1	RRIM600y1	Reyan73397y30	RRIM600y30	Functional annotation
	LOC110631987	12.0016	16.6808	2.14667	15.7298	ABC transporter F family member 4-like && Q9M1H3.1 RecName: Full=ABC transporter F family member 4; Short=ABC transporter ABCF.4; Short=AtABCF4; AltName: Full=GCN20-type ATP-binding cassette protein GCN4 && PF00005:ABC transporter
	LOC110663248	3.2657	3.54645	2.09774	0.747494	actin && O81221.1 RecName: Full=Actin && PF00022:Actin
	LOC110673549	459.135	324.019	484.758	839.797	actin-7%2C transcript variant X2 && P53492.1 RecName: Full=Actin-7; AltName: Full=Actin-2 && PF00022:Actin
	LOC110650287	19.961	28.7516	40.0529	24.838	actin-interacting protein 1-2-like && Q9LV35.1 RecName: Full=Actin-interacting protein 1-2 && -
	LOC110668408	25.6712	30.3825	7.10111	3.00753	actin-like && O81221.1 RecName: Full=Actin && PF00022:Actin
	LOC110652728	0.978748	1.27041	0.23795	0.063815	allene oxide synthase-like%2C transcript variant X2 && K4BV52.1 RecName: Full=Allene oxide synthase 1, chloroplastic; Short=LeAOS1; AltName: Full=Cytochrome P450 74A; Flags: Precursor && PF00067:Cytochrome P450
	LOC110660903	0.133565	0.121475	0.851157	0.0456183	annexin D3-like%2C transcript variant X2 && Q9SE45.2 RecName: Full=Annexin D3; AltName: Full=AnnAt3 && PF00191:Annexin
	LOC110666560	436.496	487.748	126.305	341.167	annexin D4-like && Q9ZVJ6.1 RecName: Full=Annexin D4; AltName: Full=AnnAt4 && PF00191:Annexin
	LOC110671725	13.9578	14.0323	29.5895	24.0405	apoptosis-inducing factor 2-like%2C transcript variant X1 && A5PJM4.1 RecName: Full=Apoptosis-inducing factor 2 && PF07992:Pyridine nucleotide-disulphide oxidoreductase
	LOC110644900	260.815	168.609	43.3371	452.511	ATP-citrate synthase beta chain protein 2 && Q9FGX1.1 RecName: Full=ATP-citrate synthase beta chain protein 2; Short=ATP-citrate synthase B-2; AltName: Full=ATP-citrate lyase B-2; AltName: Full=Citrate cleavage enzyme B-2 && PF00549:CoA-ligase|PF00285:Citrate synthase
	LOC110647220	113.794	112.194	75.0895	258.075	caffeoylshikimate esterase-like && Q9C942.1 RecName: Full=Caffeoylshikimate esterase; AltName: Full=Lysophospholipase 2; Short=LysoPL2 && PF12146:Serine aminopeptidase, S33
	LOC110672203	295.372	289.864	467.301	788.739	chlorophyllase-1%2C chloroplastic-like && Q9LE89.1 RecName: Full=Chlorophyllase type 0; AltName: Full=CaCLH0; AltName: Full=Chlorophyll-chlorophyllido hydrolase 0; Short=Chlase 0; Flags: Precursor && PF07224:Chlorophyllase
	LOC110659984	53.3307	0.72786	21.1369	0.726903	cycloartenol-C-24-methyltransferase-like%2C transcript variant X4 && Q9LM02.1 RecName: Full=Cycloartenol-C-24-methyltransferase; AltName: Full=24-sterol C-methyltransferase 1; Short=Sterol C-methyltransferase 1; AltName: Full=Protein CEPHALOPOD; AltName: Full=Protein STEROL METHYLTRANSFERASE 1 && PF08498:Sterol methyltransferase C-terminal|PF08241:Methyltransferase domain
	LOC110652246	11328.4	14691	7021.14	1774.2	elicitor-responsive protein 3-like%2C transcript variant X1 && Q25AG5.1 RecName: Full=Elicitor-responsive protein 3; AltName: Full=16 kDa phloem protein; AltName: Full=RPP16 >Q0JBH9.1 RecName: Full=Elicitor-responsive protein 3; Short=OsERG3; AltName: Full=16 kDa phloem protein; AltName: Full=RPP16 && PF00168:C2 domain
RBSP(eIF)	LOC110646578	5.09335	3.52905	9.69499	10.1196	eukaryotic translation initiation factor 2D%2C transcript variant X7 && Q5PPG7.1 RecName: Full=Eukaryotic translation initiation factor 2D; Short=eIF2d; AltName: Full=Ligatin && PF01253:Translation initiation factor SUI1
	LOC110635680	279.241	257.577	712.428	356.022	eukaryotic translation initiation factor 5A-like && Q9AXJ4.2 RecName: Full=Eukaryotic translation initiation factor 5A; Short=eIF-5A && PF01287:Eukaryotic elongation factor 5A hypusine, DNA-binding OB fold
	LOC110631566	1.44009	3.9485	47.1653	79.2785	fatty acid hydroperoxide lyase%2C chloroplastic && K4CF70.1 RecName: Full=Fatty acid hydroperoxide lyase, chloroplastic; Short=LeHPL; AltName: Full=Cytochrome P450 74B && PF00067:Cytochrome P450
	LOC110633068	356.289	238.712	205.687	1475.87	glucan endo-1%2C3-beta-glucosidase%2C basic vacuolar isoform%2C transcript variant X2 && P52407.2 RecName: Full=Glucan endo-1,3-beta-glucosidase, basic vacuolar isoform; AltName: Full=(1->3)-beta-glucan endohydrolase; Short=(1->3)-beta-glucanase; AltName: Full=Beta-1,3-endoglucanase; Contains: RecName: Full=Glucan endo-1,3-beta-glucosidase minor form 3; Contains: RecName: Full=Glucan endo-1,3-bet…
	LOC110656333	2.49173	3.47376	1.28681	16.5645	glucan endo-1%2C3-beta-glucosidase%2C basic vacuolar isoform-like && P52407.2 RecName: Full=Glucan endo-1,3-beta-glucosidase, basic vacuolar isoform; AltName: Full=(1->3)-beta-glucan endohydrolase; Short=(1->3)-beta-glucanase; AltName: Full=Beta-1,3-endoglucanase; Contains: RecName: Full=Glucan endo-1,3-beta-glucosidase minor form 3; Contains: RecName: Full=Glucan endo-1,3-beta-glucosidase minor …
	LOC110663356	2.12968	1.09795	1.95579	2.60301	glutathione gamma-glutamylcysteinyltransferase 1-like && Q2TSC7.1 RecName: Full=Glutathione gamma-glutamylcysteinyltransferase 1; AltName: Full=LjPCS1-8R; AltName: Full=Phytochelatin synthase 1 && PF05023:Phytochelatin synthase|PF09328:Domain of unknown function (DUF1984)
	LOC110665287	118.491	140.343	58.1076	101.071	glyceraldehyde-3-phosphate dehydrogenase%2C cytosolic && P26520.1 RecName: Full=Glyceraldehyde-3-phosphate dehydrogenase, cytosolic && PF02800:Glyceraldehyde 3-phosphate dehydrogenase, C-terminal domain|PF00044:Glyceraldehyde 3-phosphate dehydrogenase, NAD binding domain
	LOC110660204	1.39602	0.390339	2.35957	0.219359	glyceraldehyde-3-phosphate dehydrogenase%2C cytosolic-like && P25861.1 RecName: Full=Glyceraldehyde-3-phosphate dehydrogenase, cytosolic && PF02800:Glyceraldehyde 3-phosphate dehydrogenase, C-terminal domain
	LOC110658185	15.5161	24.2065	20.6116	55.1931	heat shock protein 83-like%2C transcript variant X1 && P51819.1 RecName: Full=Heat shock protein 83 && PF00183:Hsp90 protein|PF02518:Histidine kinase-, DNA gyrase B-, and HSP90-like ATPase
	LOC110658388	18.9529	2.60176	28.3609	12.5013	heavy metal-associated isoprenylated plant protein 39-like
	LOC110658222	254.271	593.516	120.485	764.962	hevamine-A && P23472.2 RecName: Full=Hevamine-A; Includes: RecName: Full=Chitinase; Includes: RecName: Full=Lysozyme; Flags: Precursor && PF00704:Glycosyl hydrolases family 18
	LOC110658223	295.833	644.461	143.758	949.088	hevamine-A-like && P23472.2 RecName: Full=Hevamine-A; Includes: RecName: Full=Chitinase; Includes: RecName: Full=Lysozyme; Flags: Precursor && PF00704:Glycosyl hydrolases family 18
	LOC110656966	59.0488	43.2738	270.184	144.17	lanC-like protein GCR2%2C transcript variant X2 && F4IEM5.1 RecName: Full=LanC-like protein GCR2; AltName: Full=G-protein coupled receptor 2 && PF05147:Lanthionine synthetase C-like protein
	LOC110638544	115.587	132.554	10.8009	222.991	long chain acyl-CoA synthetase 1-like%2C transcript variant X1 && O22898.1 RecName: Full=Long chain acyl-CoA synthetase 1; AltName: Full=Protein ECERIFERUM 8 && PF00501:AMP-binding enzyme
	LOC110637040	16.0094	22.2676	44.6598	36.5506	long chain acyl-CoA synthetase 4 && Q9T0A0.1 RecName: Full=Long chain acyl-CoA synthetase 4 && PF00501:AMP-binding enzyme
	LOC110648474	0.896314	6.18951	20.2768	2.57799	MADS-box protein FLOWERING LOCUS C-like%2C transcript variant X2 && Q9S7Q7.1 RecName: Full=MADS-box protein FLOWERING LOCUS C; AltName: Full=MADS-box protein FLOWERING LOCUS F && PF01486:K-box region|PF00319:SRF-type transcription factor (DNA-binding and dimerisation domain)
	LOC110673713	417.636	423.117	598.794	1042.01	metacaspase-4-like && O64517.1 RecName: Full=Metacaspase-4; Short=AtMC4; AltName: Full=Metacaspase 2d; Short=AtMCP2d; AltName: Full=Metacaspase-7; Contains: RecName: Full=Metacaspase-4 subunit p20; Contains: RecName: Full=Metacaspase-4 subunit p10 && PF00656:Caspase domain
	LOC110637718	808.492	706.029	85.3434	1136.91	NADP-dependent glyceraldehyde-3-phosphate dehydrogenase && P81406.1 RecName: Full=NADP-dependent glyceraldehyde-3-phosphate dehydrogenase; AltName: Full=Glyceraldehyde-3-phosphate dehydrogenase [NADP(+)]; AltName: Full=Non-phosphorylating glyceraldehyde 3-phosphate dehydrogenase; AltName: Full=Triosephosphate dehydrogenase && PF00171:Aldehyde dehydrogenase family
	LOC110668966	12.4671	14.9587	4.72946	27.5893	NADP-dependent glyceraldehyde-3-phosphate dehydrogenase-like && P93338.1 RecName: Full=NADP-dependent glyceraldehyde-3-phosphate dehydrogenase; AltName: Full=Glyceraldehyde-3-phosphate dehydrogenase [NADP(+)]; AltName: Full=Non-phosphorylating glyceraldehyde 3-phosphate dehydrogenase; AltName: Full=Triosephosphate dehydrogenase && PF00171:Aldehyde dehydrogenase family
	LOC110657778	934.04	944.598	89.264	973.149	NADPH-dependent aldehyde reductase 1%2C chloroplastic && Q5KTS5.1 RecName: Full=Glucose and ribitol dehydrogenase; AltName: Full=Carrot ABA-induced in somatic embryos 5 protein && PF00106:short chain dehydrogenase
	LOC110662223	444.711	611.771	122.264	690.923	O-acyltransferase WSD1-like%2C transcript variant X1 && Q93ZR6.1 RecName: Full=O-acyltransferase WSD1; AltName: Full=Diacylglycerol O-acyltransferase; Short=DGAT; AltName: Full=Long-chain-alcohol O-fatty-acyltransferase; AltName: Full=Wax synthase; Short=WS && PF03007:Wax ester synthase-like Acyl-CoA acyltransferase domain|PF06974:Protein of unknown function (DUF1298)
RBIP	LOC110655872	335.368	741.834	268.55	1257.43	patatin-like protein 2 && O48723.1 RecName: Full=Patatin-like protein 2; Short=AtPLP2; AltName: Full=Patatin-related phospholipase A IIalpha; Short=pPLAIIa; AltName: Full=Phospholipase A IIA; Short=AtPLAIIA && PF01734:Patatin-like phospholipase
	LOC110636627	179.389	1740.95	0	0.234623	pectinesterase%2C transcript variant X1 && P83947.1 RecName: Full=Pectinesterase/pectinesterase inhibitor; Includes: RecName: Full=Pectinesterase inhibitor; AltName: Full=Pectin methylesterase inhibitor; Includes: RecName: Full=Pectinesterase; Short=PE; AltName: Full=Pectin methylesterase; Flags: Precursor && PF04043:Plant invertase/pectin methylesterase inhibitor|PF01095:Pectinesterase
	LOC110655882	1136.94	1676.05	304.501	2474.8	peptidyl-prolyl cis-trans isomerase && P21568.1 RecName: Full=Peptidyl-prolyl cis-trans isomerase; Short=PPIase; AltName: Full=Cyclophilin; AltName: Full=Cyclosporin A-binding protein; AltName: Full=Rotamase && PF00160:Cyclophilin type peptidyl-prolyl cis-trans isomerase/CLD
	LOC110673759	2.4246	1.2986	46.5369	6.06502	peptidyl-prolyl cis-trans isomerase-like && Q39613.1 RecName: Full=Peptidyl-prolyl cis-trans isomerase; Short=PPIase; AltName: Full=Cyclophilin; AltName: Full=Cyclosporin A-binding protein; AltName: Full=Rotamase && PF00160:Cyclophilin type peptidyl-prolyl cis-trans isomerase/CLD
	LOC110633332	101.979	208.206	126.451	75.1372	peptidyl-prolyl cis-trans isomerase-like && Q39613.1 RecName: Full=Peptidyl-prolyl cis-trans isomerase; Short=PPIase; AltName: Full=Cyclophilin; AltName: Full=Cyclosporin A-binding protein; AltName: Full=Rotamase && PF00160:Cyclophilin type peptidyl-prolyl cis-trans isomerase/CLD
	LOC110670068	18.44	36.9181	40.8705	59.367	phosphoglycerate mutase-like protein 1 && Q9FGF0.1 RecName: Full=Phosphoglycerate mutase-like protein 1 && PF00300:Histidine phosphatase superfamily (branch 1)
	LOC110659081	67.9989	104.566	26.4005	90.845	phospholipase D alpha 1%2C transcript variant X1 && Q41142.1 RecName: Full=Phospholipase D alpha 1; Short=PLD 1; AltName: Full=Choline phosphatase 1; AltName: Full=Phosphatidylcholine-hydrolyzing phospholipase D 1; Flags: Precursor && PF12357:Phospholipase D C terminal|PF00168:C2 domain|PF00614:Phospholipase D Active site motif
	LOC110665843	302.08	511.117	41.0651	267.988	phospholipase D alpha 1-like%2C transcript variant X1 && Q41142.1 RecName: Full=Phospholipase D alpha 1; Short=PLD 1; AltName: Full=Choline phosphatase 1; AltName: Full=Phosphatidylcholine-hydrolyzing phospholipase D 1; Flags: Precursor && PF00168:C2 domain|PF12357:Phospholipase D C terminal|PF00614:Phospholipase D Active site motif
	LOC110648364	136.121	199.348	151.302	314.154	probable 1-acylglycerol-3-phosphate O-acyltransferase%2C transcript variant X1 && Q0J0A4.3 RecName: Full=Probable 1-acylglycerol-3-phosphate O-acyltransferase; AltName: Full=Lipid droplet-binding protein CGI-58 homolog && PF00561:alpha/beta hydrolase fold
	LOC110653484	2.95735	2.66914	8.92203	0.681963	probable calcium-binding protein CML49 && Q9FYE4.1 RecName: Full=Probable calcium-binding protein CML50; AltName: Full=Calmodulin-like protein 50 && PF00036:EF hand
	LOC110668291	166.125	256.892	23.5929	189.374	probable carboxylesterase 18 && Q9LT10.1 RecName: Full=Probable carboxylesterase 18; AltName: Full=AtCXE18 && PF07859:alpha/beta hydrolase fold
	LOC110656005	8.53371	11.5431	5.80497	19.4637	probable endo-1%2C3(4)-beta-glucanase ARB_01444 && D4AZ24.1 RecName: Full=Probable endo-1,3(4)-beta-glucanase ARB_01444; Short=Endo-1,3-beta-glucanase; Short=Endo-1,4-beta-glucanase; AltName: Full=Laminarinase; Flags: Precursor && PF03639:Glycosyl hydrolase family 81
	LOC110641016	99.3113	92.4885	155.481	72.0578	probable glutathione peroxidase 2 && O04922.1 RecName: Full=Probable glutathione peroxidase 2 && PF00255:Glutathione peroxidase
	LOC110641633	77.8152	95.2089	66.3635	135.34	probable nucleoredoxin 1 && O80763.1 RecName: Full=Probable nucleoredoxin 1; Short=AtNrx1 && PF13905:Thioredoxin-like
	LOC110672310	1.21166	1.87005	0.567407	1.98024	probable xyloglucan galactosyltransferase GT14 && Q84R16.1 RecName: Full=Probable xyloglucan galactosyltransferase GT14; AltName: Full=Glycosyltransferase 14; Short=AtGT14 && PF03016:Exostosin family
	LOC110663197	2998.88	5803.24	1357.74	5536.46	protease inhibitor HPI%2C transcript variant X2 && Q6XNP7.2 RecName: Full=Protease inhibitor HPI; AltName: Full=HbPI1; AltName: Full=Protease inhibitor 1 && PF00280:Potato inhibitor I family
	LOC110648732	2.34716	5.87456	14.2036	21.6521	protein argonaute 2-like%2C transcript variant X1 && Q9SHF3.1 RecName: Full=Protein argonaute 2 && PF02170:PAZ domain|PF08699:Argonaute linker 1 domain|PF02171:Piwi domain|PF16486:N-terminal domain of argonaute
	LOC110673293	51.7488	59.6108	95.2176	150.232	protein argonaute 5-like%2C transcript variant X6 && Q9SJK3.2 RecName: Full=Protein argonaute 5 && PF08699:Argonaute linker 1 domain|PF02171:Piwi domain|PF02170:PAZ domain|PF16486:N-terminal domain of argonaute|PF16487:Mid domain of argonaute|PF16488:Argonaute linker 2 domain
	LOC110648851	62.1393	92.3119	132.907	154.533	protein EARLY-RESPONSIVE TO DEHYDRATION 7%2C chloroplastic-like && O48832.1 RecName: Full=Protein EARLY-RESPONSIVE TO DEHYDRATION 7, chloroplastic; Flags: Precursor && PF06911:Senescence-associated protein
	LOC110661813	629.462	823.116	961.919	2973.67	Protein of unknown function, DUF538
	LOC110669238	35.3038	48.9365	6.07395	62.0173	pyrophosphate--fructose 6-phosphate 1-phosphotransferase subunit alpha-like && Q41140.1 RecName: Full=Pyrophosphate--fructose 6-phosphate 1-phosphotransferase subunit alpha; Short=PFP; AltName: Full=6-phosphofructokinase, pyrophosphate dependent; AltName: Full=PPi-PFK; AltName: Full=Pyrophosphate-dependent 6-phosphofructose-1-kinase && PF00365:Phosphofructokinase
	LOC110634340	131.027	188.589	125.278	360.987	random slug protein 5-like%2C transcript variant X2 && - && PF00650:CRAL/TRIO domain
	LOC110652374	8.95822	5.90556	17.8196	7.02137	ras-related protein RABA2a-like && O04486.1 RecName: Full=Ras-related protein RABA2a; Short=AtRABA2a; AltName: Full=Ras-related protein Rab11C; Short=AtRab11C; Flags: Precursor && PF00071:Ras family
	LOC110640633	40.2217	43.991	112.597	36.1584	ras-related protein RABB1b && P92963.1 RecName: Full=Ras-related protein RABB1c; Short=AtRABB1c; AltName: Full=Ras-related protein Rab2A; Short=AtRab2A && PF00071:Ras family
	LOC110662655	8.06083	12.2016	8.71596	3.13837	ras-related protein RABC2a-like && O49841.1 RecName: Full=Ras-related protein RABC2a; Short=AtRABC2a; AltName: Full=Ras-related protein Rab18B; Short=AtRab18B && PF00071:Ras family
	LOC110648609	45.4694	63.3125	112.443	42.051	ras-related protein RABF2a && P31582.1 RecName: Full=Ras-related protein RABF2a; Short=AtRABF2a; AltName: Full=Ras-related protein Rab5A; Short=AtRab5A; AltName: Full=Ras-related protein Rha1 && PF00071:Ras family
	LOC110671638	32.8141	41.0248	11.3433	14.5966	serine/threonine-protein kinase D6PK%2C transcript variant X1 && Q9FG74.1 RecName: Full=Serine/threonine-protein kinase D6PK; AltName: Full=D6 protein kinase; AltName: Full=Serine/threonine-protein kinase AGC1-1; AltName: Full=Serine/threonine-protein kinase AtPK64 && PF00069:Protein kinase domain
	LOC110664617	574.224	595.014	217.412	818.406	sphingosine kinase 1-like%2C transcript variant X1 && Q8L7L1.1 RecName: Full=Sphingosine kinase 1 && PF00781:Diacylglycerol kinase catalytic domain
	LOC110633953	159.333	165.443	349.911	293.065	ubiquitin-conjugating enzyme E2 36 && Q94A97.1 RecName: Full=Ubiquitin-conjugating enzyme E2 35; AltName: Full=E2 ubiquitin-conjugating enzyme 35; AltName: Full=Ubiquitin carrier protein 35 && PF00179:Ubiquitin-conjugating enzyme
	LOC110634600	0.601807	0.332336	0.0300516	0.220945	uncharacterized LOC110634600 && P61871.1 RecName: Full=Lipase; AltName: Full=Lipase II; AltName: Full=RNL; AltName: Full=Triacylglycerol lipase; Flags: Precursor >P61872.1 RecName: Full=Lipase; AltName: Full=RDL; AltName: Full=Triacylglycerol lipase; Short=ROL; Flags: Precursor && PF01764:Lipase (class 3)
	LOC110673705	9.84925	20.0107	5.31631	7.54826	uncharacterized LOC110673705%2C transcript variant X3 && - && -
	LOC110633003	120.583	124.298	278.373	208.215	universal stress protein PHOS34 && - && PF00582:Universal stress protein family
	LOC110635136	0.995066	1.37722	2.64941	2.11676	vesicle-fusing ATPase-like && Q9M0Y8.2 RecName: Full=Vesicle-fusing ATPase; AltName: Full=N-ethylmaleimide-sensitive fusion protein; AltName: Full=Vesicular-fusion protein NSF && PF00004:ATPase family associated with various cellular activities (AAA)
