# Supplementary material for: Comparative analysis of latex transcriptomes reveals the potential mechanisms underlying rubber molecular weight variations between the Hevea brasiliensis clones RRIM600 and Reyan7-33–97
Source: BMC Plant Biol. 2021 May 29;21:244. doi: 10.1186/s12870-021-03022-5 (PMC8164328; doi:10.1186/s12870-021-03022-5)
Supplement: Supplementary file 6 — Table S6. Classifications and the FPKM values of the differentially expressed transcription factors in latex samples. [file 12870_2021_3022_MOESM6_ESM.xlsx]

## Sheet: Table S6
Comparative analysis of latex transcriptomes reveals the potential mechanisms underlying the rubber molecular weight variations among Hevea brasiliensis clones RRIM600 and Reyan7-33-97 Shichao Xin, Yuwei Hua, Ji Li, Xuemei Dai, Xianfeng Yang, Jinu Udayabhanu, Huasun Huang* and Tiandai Huang*
Table S6. Classifications and the FPKM values of the differentially expressed transcription factors in latex samples.
TF classification	Gene id	Reyan73397y1	RRIM600y1	Reyan73397y30	RRIM600y30
BPC	LOC110656288	0.848431	0.955104	0.211553	1.1345
WRKY	LOC110655994	0.113964	0.243793	12.2021	0.51054
	LOC110648467	0.0683288	0.0370902	26.4163	3.89747
	LOC110641926	0	0.0087976	39.3477	0.0459383
	LOC110640762	0	0	45.4971	0
	LOC110669417	12.2781	8.26875	0.73198	0.352981
	LOC110648046	0	0	55.7728	0.0389829
	LOC110664140	0	0.0304575	21.2149	0.0971601
	LOC110631545	3.00131	3.85163	22.9409	9.71242
	LOC110671897	0	0.440547	16.5475	0.217312
	LOC110666957	0.877994	1.13771	5.05875	4.94656
	LOC110640523	2.15419	7.66655	19.9437	3.91979
	LOC110659119	112.463	85.1714	17.3388	45.3564
	LOC110637416	0.684395	0.383345	4.40207	11.3705
	LOC110663702	3.78449	2.33842	10.1478	1.83359
	LOC110658272	2.55824	0.53021	0.0325959	0.034287
	LOC110647580	2.09401	1.62228	0.0216016	0.0873948
	LOC110639804	2.67231	15.5261	0.315314	0.835378
	LOC110670578	0.00787186	0.0577005	0.725713	0
	LOC110641384	0.0167331	0.13202	1.57228	0.136348
	LOC110656309	0	0.126993	0.875057	0.012515
	LOC110649327	1.63127	5.64573	0.195782	0.0596687
	LOC110643251	1.54122	0.953649	4.31781	2.22615
	LOC110661843	0.0517744	0.0340541	0.642555	0
	LOC110659644	69.5433	56.3414	28.3597	23.9088
	LOC110659777	0.511071	0.274768	2.68547	0.0902569
	LOC110667638	0.256177	7.72549	0.47073	0.0494785
	LOC110657646	0.301942	4.52631	2.18201	0.233739
	LOC110662494	0.00757434	0.798907	0.104676	4.72401
	LOC110648285	11.9492	5.82261	13.4127	6.37723
	LOC110672939	2.09201	6.56782	0.555636	0.916473
	LOC110638539	5.639	4.10268	8.93827	10.7061
	LOC110633907	0.143996	0.671652	0.0817319	0.0162598
	LOC110658347	2.0996	0.856613	3.65476	0.438155
	LOC110633736	0.273595	0.128394	0.218895	0.00465184
	LOC110652994	0.455004	3.85076	1.21634	0.0168557
NAC	LOC110642719	0.131144	0.665964	27.9688	0.514414
	LOC110641661	0.402753	0.243113	25.0148	2.58795
	LOC110640563	0.856308	0.38836	16.6715	1.35203
	LOC110655346	0.857898	0.998141	16.3949	2.11997
	LOC110663457	10.61	4.63164	0	0.0433729
	LOC110636839	26.3229	12.9486	2.60526	1.82035
	LOC110648772	0.040339	0.107856	6.20619	0.833974
	LOC110663907	0.128916	0.0111184	4.08014	0.933418
	LOC110662111	20.1082	17.4023	98.1429	128.252
	LOC110639435	98.5157	41.5276	14.2153	47.6769
	LOC110646542	7.01516	2.66509	62.8314	49.6366
	LOC110672523	6.72321	7.7156	22.7963	15.2991
	LOC110650004	2.17047	0.835824	0	0.0267131
	LOC110636821	0	0.0486933	2.01277	0.121483
	LOC110657195	1.85865	0.847819	0	0.0109799
	LOC110660824	1.01576	0.804403	6.52065	2.28669
	LOC110637284	14.5464	23.0333	1.90126	1.37734
	LOC110673035	1.43175	2.32596	7.04996	4.34026
	LOC110663856	5.22964	10.2907	0.629258	0.206732
	LOC110648261	0.927828	0.308199	0	0
	LOC110644302	1.904	1.20357	0	0.0904646
	LOC110646718	28.3625	26.8686	60.5583	46.717
	LOC110632611	0.810015	0.0954406	0	0
	LOC110672469	0.87213	0.152384	0.0615721	0.0429662
	LOC110643772	0.00950026	0	0.659497	0
	LOC110631747	0.0845098	0.198507	0.755963	0.567091
	LOC110672762	0.576448	0.217411	0	0
	LOC110665141	13.6553	20.0485	32.9699	22.0438
	LOC110669586	0.495146	0.188046	0.0192124	0
	LOC110642020	0.456945	0.233912	0.0231625	0.0324855
	LOC110643741	9.65368	4.86442	3.23268	2.38122
	LOC110632332	0.220994	0.0977469	0	0
	LOC110647958	0	0.0274525	0.331324	0.0892007
	LOC110645465	24.9306	35.1086	30.6883	115.753
	LOC110652655	0.990202	1.16796	1.00918	0.0713242
	LOC110661683	0.629719	0.424587	0.185418	1.52256
AP2	LOC110642253	1.20502	4.66683	58.0368	9.68993
	LOC110633439	0.075463	0.941067	31.7752	0.777651
	LOC110637119	17.6438	7.51668	0.541512	3.21111
	LOC110642635	0.0917581	0.0525281	23.9962	0.224762
	LOC110660374	30.3625	25.1596	0.912422	38.0627
	LOC110638604	2.43263	0.214663	30.9066	10.6879
	LOC110641584	43.1024	22.0672	0.882078	1.01023
	LOC110662960	11.5456	67.2697	120.744	0.481674
	LOC110667284	18.93	17.9943	2.32289	18.4293
	LOC110673933	13.5085	39.0092	279.125	91.5924
	LOC110641764	0	0.0728874	38.9843	0.422366
	LOC110665473	0	0.0515639	20.8554	0.476199
	LOC110656730	0.321256	0.219953	4.95137	2.61085
	LOC110634704	9.16471	6.9895	2.13348	8.61041
	LOC110652141	5.7603	5.41105	0.106967	0.537984
	LOC110672801	0	0.0893446	7.20644	0.107985
	LOC110633014	0.454588	0.985834	8.0835	0.891984
	LOC110661402	0.0404625	0.041407	8.18562	0.495635
	LOC110638920	30.7528	38.5758	3.05303	10.5147
	LOC110645566	1.05937	2.03128	5.34336	3.77902
	LOC110663623	1.06894	3.32543	13.3052	0.221309
	LOC110672034	0.69836	0.42919	4.22692	1.37713
	LOC110637555	39.3711	48.5528	116.519	45.3395
	LOC110655564	0	0.0200416	4.2442	0
	LOC110644517	0.0657906	0.0408588	1.6449	0.653713
	LOC110633776	2.73936	3.24722	9.201	1.29224
	LOC110659270	0.306621	0.804691	2.73082	0.489335
	LOC110666475	1.46119	0.464024	0.0158937	0.0996936
	LOC110634457	2.96153	2.32498	0.49078	1.97122
	LOC110649453	0.0609262	0	1.26964	0.0666998
	LOC110646334	1.06751	1.56251	0.0266446	2.48345
	LOC110670584	102.009	154.518	375.152	196.326
	LOC110672518	14.4783	11.5481	39.0071	39.1169
	LOC110645805	9.40847	7.41952	3.1567	4.37986
	LOC110670758	0	0	0.918909	0
	LOC110671163	0	0.0327136	1.1564	0
	LOC110636765	30.4541	26.8367	98.0385	71.914
	LOC110673704	5.05468	2.93543	21.4719	2.40676
	LOC110631493	0.130892	0.0827101	18.7778	0.85711
	LOC110670726	1.46176	0.457097	0.0153194	0
	LOC110664068	0.659764	0.0092913	0	0.566764
	LOC110642277	0.31777	0.142233	0	0.0205226
	LOC110634453	19.6776	30.9727	54.0276	16.6215
	LOC110665499	0.418141	0.223372	0.031248	0.260433
	LOC110634608	77.5437	73.6007	168.695	113.558
	LOC110636761	3.61459	3.7888	1.10654	3.62667
	LOC110669131	2.68672	2.29057	0.652583	0.801579
	LOC110647848	0	0	0.880527	0
	LOC110632863	0.556634	0.982186	2.32808	0.0524467
	LOC110637670	0	0	0.689362	0
	LOC110649539	0.585309	0.143354	0.0233042	0
	LOC110635708	2.60231	2.51878	7.27479	1.31981
	LOC110644576	0.0517772	0.0892681	1.19751	0.0818363
	LOC110663813	0.116565	0.15902	1.26229	1.37741
	LOC110633407	5.9698	16.2542	2.91116	4.22728
	LOC110669841	1.44692	0.520708	0.434041	0.450419
	LOC110633712	1.3311	0.752474	3.04153	3.6949
	LOC110651325	0.771214	1.0992	2.23785	4.1034
	LOC110646907	9.91827	8.42708	3.44502	39.3904
	LOC110653116	0	0	0.704104	0
	LOC110669873	4.20634	0.501723	6.4778	4.01058
	LOC110673382	0	0.38426	0.0376203	0
	LOC110642007	1.20497	3.37001	1.68832	0.221013
	LOC110645434	0.160675	0.0714033	0.132281	1.02453
	LOC110651326	0.833194	0.750735	2.02287	3.01878
	LOC110634420	0.156021	0	1.08161	0.0168136
	LOC110641274	0	0.0301838	0	0.414163
AUX/IAA	LOC110635635	0	0.037392	52.9202	0.410847
	LOC110638886	3.14879	5.27129	22.5008	1.06183
	LOC110639614	2.56012	5.27091	15.8109	5.00464
	LOC110639917	16.7989	6.68647	1.16214	17.404
	LOC110643025	31.9306	36.9142	62.9076	22.4132
	LOC110645740	28.068	13.0934	2.52487	19.2342
	LOC110646010	9.0111	3.84303	0.1342	6.29982
	LOC110653828	1.11113	1.31852	53.5611	0.741833
	LOC110661638	0.27549	0.139832	3.78998	0
	LOC110670723	1.99782	1.20877	0.0113039	0.637632
	LOC110673200	0.272937	0.418446	9.38569	0.216923
B3	LOC110669886	2.34602	1.22056	4.77965	1.72793
	LOC110672557	1.06486	2.82003	0.738307	0.0359046
B3-ARF	LOC110632111	6.63546	4.70688	4.77274	11.3218
	LOC110633260	7.85887	11.8681	0.278183	5.63609
	LOC110634720	23.0463	29.4475	21.4255	42.9982
	LOC110635616	122.398	165.865	11.4547	148.787
	LOC110637062	5.82765	3.65921	2.0275	4.76102
	LOC110640290	26.7597	26.3367	10.327	28.322
	LOC110642710	14.0153	4.33747	2.89716	6.86747
	LOC110645000	18.4413	8.51957	10.3393	21.5832
	LOC110650061	5.38034	7.40654	2.27626	23.2995
	LOC110650212	3.14829	4.84936	1.12104	9.70509
	LOC110653489	25.7739	22.951	3.20807	18.5531
	LOC110666901	32.4812	45.5816	8.20333	27.1938
BES1	LOC110644567	6.10287	5.59319	3.63634	8.18053
	LOC110656865	25.4368	33.2844	90.1874	43.0504
	LOC110670004	12.2709	17.0248	0.913329	4.03304
bHLH	LOC110631494	0.0932739	0.019933	0.99929	0
	LOC110633630	0.00917501	0.249309	0.0856769	5.81077
	LOC110633971	9.88547	23.6023	6.00132	16.9111
	LOC110637846	0.0347647	0.0637599	0.591544	0
	LOC110639730	7.18414	67.419	0.018237	4.00175
	LOC110641971	1.46329	0.624249	12.6015	2.20448
	LOC110642900	0.341709	0.676495	1.4584	0.114536
	LOC110644947	0	0	0.688769	0.0107145
	LOC110645145	0.0326526	0	0.607951	0.0153418
	LOC110645780	39.877	16.7995	84.6605	35.7905
	LOC110647710	3.35522	8.3673	0.842162	3.47759
	LOC110647995	70.6017	66.9395	18.09	107.013
	LOC110652320	121.703	156.49	3.44427	127.852
	LOC110652595	2.91943	1.78205	4.36548	0.0581401
	LOC110656105	0.950876	0.196148	0.60603	0.0346897
	LOC110656926	0.365308	0.794246	0.0272443	1.07967
	LOC110661186	9.03553	0.73121	0.162574	4.91791
	LOC110662305	38.6376	36.0847	25.2253	63.026
	LOC110662564	2.55081	2.10504	0.404453	1.73114
	LOC110665468	28.8069	26.2947	2.97892	33.7822
	LOC110670570	1.71474	4.66861	2.28572	0.426373
	LOC110672372	4.69199	3.81587	10.4118	3.99545
	LOC110673060	315.039	270.794	286.752	993.934
bZIP	LOC110636019	9.6214	13.6703	22.1137	6.80713
	LOC110649337	41.1182	42.2602	9.3361	18.8749
	LOC110649929	26.2688	4.43968	8.7923	1.5357
	LOC110651646	1.42769	3.36639	0	0.354318
	LOC110654055	0.409129	0.0722062	2.71937	0.121897
	LOC110657867	1.62048	0.76496	1.01299	0.113012
	LOC110664098	15.2386	16.5974	5.83066	13.5295
	LOC110665375	7.13642	6.91794	1.93859	5.30459
	LOC110665452	0.706569	0.313682	1.115	0.245923
	LOC110669980	8.89842	6.8291	8.93929	3.31414
	LOC110671048	22.9821	16.6801	8.14742	21.0424
C2C2-CO-like	LOC110639441	3.47639	3.08851	1.91382	5.39477
C2C2-Dof	LOC110631509	26.7311	24.343	0.599167	2.21877
	LOC110632094	6.15469	11.9128	0.216725	2.05193
	LOC110633887	8.12278	5.86673	0.0929249	3.77927
	LOC110639071	188.004	204.908	105.191	227.808
	LOC110641167	8.89415	21.366	0.457004	3.85544
	LOC110647004	0.723974	2.24066	4.84849	0.382977
	LOC110655552	12.2976	9.92449	3.10802	10.9692
	LOC110655750	5.0493	9.28809	8.45023	2.64911
	LOC110663230	20.8938	15.318	0.712697	6.54877
	LOC110663757	4.19637	3.7472	0.286516	3.89547
	LOC110664381	101.439	95.4964	0.050046	71.2522
	LOC110664409	0.308109	0.276763	0.403493	3.60622
	LOC110667373	0.655708	1.50793	0.0907378	1.3356
C2C2-GATA	LOC110634434	38.9365	32.9605	14.6765	35.7952
	LOC110639300	12.0618	6.41924	18.1157	4.63808
	LOC110642715	5.25454	3.98294	0.504251	2.69496
	LOC110652459	2.32064	13.7016	0.103965	2.61172
	LOC110659109	26.4426	15.5165	0.68288	6.73075
	LOC110659408	4.38493	3.48474	6.24229	0.848707
	LOC110662153	11.6472	10.2506	44.2517	10.7204
	LOC110663042	1.4301	2.15461	4.43249	0.231017
C2C2-LSD	LOC110648007	22.4539	13.3216	32.3292	14.9916
C2H2	LOC110633199	0.583391	0.499829	0.748381	0.084959
	LOC110635330	1.38746	2.06051	0.081031	0.795155
	LOC110636057	1.30141	1.79151	0.0671639	0.898269
	LOC110639969	0.588323	0.92148	9.93888	1.81856
	LOC110639970	0.170612	0.132393	2.70001	0.664696
	LOC110641402	3.07915	0.0183966	3.69797	0.181899
	LOC110645618	15.9692	23.7225	1.48561	6.90557
	LOC110646918	20.8806	26.4026	0.412284	7.40317
	LOC110650382	43.7931	28.6157	12.4575	27.522
	LOC110651654	0.829604	3.61817	6.87067	0.529002
	LOC110652243	33.9587	46.4512	20.2771	63.1132
	LOC110656142	2.89597	6.9796	9.71141	2.14354
	LOC110657717	3.71277	4.31914	7.72456	32.1717
	LOC110663035	0.078019	0.0676351	5.40583	0.0361153
	LOC110666041	13.287	2.27594	0.17026	5.08468
	LOC110666357	1.32014	1.63625	0.0827184	1.62191
	LOC110669588	0	0	255.823	0.0775425
	LOC110670009	0.309595	0.732414	18.8197	0.460549
	LOC110672069	18.6102	8.00625	2.35189	30.9149
	LOC110673096	67.5992	28.1129	5.44186	35.7244
	LOC110673343	6.78503	0.648358	7.90292	39.2084
C3H	LOC110642917	1.91707	0.122951	1.35004	0.0329778
	LOC110647872	0.886145	4.38958	0	25.7424
	LOC110653914	3.61252	5.02181	2.22611	5.88536
	LOC110654543	10.1445	10.1287	5.96176	16.1061
	LOC110656794	35.395	25.3748	17.9825	43.1878
	LOC110659426	8.45621	8.90221	26.3798	9.96546
	LOC110666269	11.8538	5.18756	13.8067	5.98358
CAMTA	LOC110670380	4.77525	4.801	2.61454	5.5434
CPP	LOC110673218	1.90542	2.14569	0.50139	2.02943
CSD	LOC110655045	4.82873	14.5146	0.110695	1.73185
	LOC110665571	9.38988	15.6482	34.3746	10.354
DBP	LOC110637316	2.26228	2.78364	5.86583	1.7906
E2F-DP	LOC110666250	2.78612	2.6529	4.9415	1.91975
FAR1	LOC110650555	21.4237	14.399	4.73327	12.6461
	LOC110664841	5.55508	9.91592	1.6944	5.26624
	LOC110669026	8.27806	9.03595	5.30333	10.6628
GARP-ARR-B	LOC110648143	2.67541	2.01922	3.20498	0.199948
	LOC110661783	17.6696	25.7618	16.5549	34.8293
GARP-G2-like	LOC110636202	10.2136	6.20231	3.03853	10.4661
	LOC110645597	12.4107	14.5146	5.98739	24.4093
	LOC110648618	10.2879	0.474511	9.89928	3.24732
	LOC110654982	2.6583	5.47333	7.63412	1.04908
	LOC110656263	3.77813	3.97589	0.53452	27.5175
	LOC110665791	1.89409	3.19741	1.57315	4.69268
	LOC110665863	192.591	172.352	118.454	262.784
GeBP	LOC110672119	22.1287	11.9367	23.6346	11.2804
GNAT	LOC110637314	17.993	22.5348	45.1899	21.8571
	LOC110643422	0.909502	1.49466	0.190254	1.80727
	LOC110652328	9.17988	8.46427	23.5336	9.68936
GRAS	LOC110640603	1.0056	0.475679	1.54993	0.337986
	LOC110640607	0.541966	0.976888	4.99883	0.0454926
	LOC110640631	17.3586	16.1876	6.14773	14.1848
	LOC110643482	10.1195	15.1679	16.7821	7.11253
	LOC110644204	0.370655	1.17947	0.0922383	0.750409
	LOC110654269	15.9798	6.67192	0.450221	2.27437
	LOC110654907	13.1578	16.4447	31.9333	9.04582
	LOC110661412	1.77039	0.451145	2.48795	0.423644
	LOC110663026	13.1189	18.6917	18.6146	42.1077
	LOC110665019	3.24928	6.3725	0.736663	2.62397
	LOC110665214	0.971776	0.421447	1.44763	0.31196
	LOC110669728	21.6539	18.2043	2.28061	7.92802
	LOC110669995	20.6635	30.109	66.9143	15.1115
	LOC110670123	2.67975	5.29828	0.0502635	1.03893
GRF	LOC110631803	0.0238581	0.0122075	1.36834	0
	LOC110644816	7.76957	1.3947	1.04193	14.357
	LOC110646110	6.86644	1.11099	0.051039	1.37782
	LOC110661875	7.23031	3.93449	1.37587	4.81486
	LOC110669766	2.34095	0.606469	0.0267212	0.928249
HB-BELL	LOC110633691	0.508787	0.540028	1.8789	0.197564
	LOC110635038	1.12245	0.338163	1.22268	0.0277685
	LOC110643460	29.2708	26.1187	3.16936	11.8775
	LOC110655143	1.35775	1.39583	1.04655	2.4104
	LOC110661896	54.0684	43.7108	5.89327	52.9022
HB-HD-ZIP	LOC110632490	126.599	114.833	1.17247	16.0502
	LOC110634456	4.6772	12.6593	0.715768	7.22595
	LOC110638064	6.02833	16.9647	0.514987	7.91866
	LOC110640382	16.892	15.3972	12.1117	52.3656
	LOC110643711	216.272	271.343	2.72354	109.793
	LOC110646198	7.31891	17.7198	0.34545	8.96592
	LOC110653543	157.144	168.986	31.564	132.397
	LOC110661410	35.7273	45.4933	2.45841	19.6322
	LOC110670569	57.3853	33.0575	1.17268	20.9716
	LOC110671078	5.15223	5.79924	1.43416	6.93685
HB-KNOX	LOC110651886	29.0438	22.9018	9.97485	30.0786
	LOC110656693	2.64992	0.211764	1.17359	0.112116
HB-other	LOC110632871	6.82324	6.62001	2.76017	8.96504
	LOC110646683	13.7527	17.2092	9.28151	21.7107
HB-WOX	LOC110672819	6.76877	3.35123	12.8292	4.34646
HMG	LOC110634786	1.113	0.763425	32.3274	3.20574
	LOC110672815	79.6239	46.6848	119.113	49.5906
HRT	LOC110639607	1.76264	2.47379	0.301745	1.39543
HSF	LOC110632468	2.19866	1.79139	2.17389	9.25966
	LOC110633091	4.2489	3.594	18.4238	6.99407
	LOC110637337	0.736981	0.0963245	1.21926	15.7845
	LOC110637338	0.099102	0	4.96506	0.948849
	LOC110639418	0	0	0.970442	0
	LOC110642379	0	0.0472411	10.7838	1.14451
	LOC110648010	0.072411	0	0.631435	0
	LOC110653261	0.193635	0.061766	3.48086	0
	LOC110663709	7.42354	8.60443	8.23297	25.242
	LOC110672167	0.235391	0.125181	0.322187	1.40751
IWS1	LOC110663147	11.6551	13.1669	4.67546	10.2823
Jumonji	LOC110646586	1.26213	2.06628	1.39855	3.66568
	LOC110652189	5.28849	5.70475	3.16885	6.59665
	LOC110666717	3.21996	4.15452	1.33126	3.62651
	LOC110671140	6.67961	7.17707	3.53068	7.22836
LIM	LOC110664314	4.68515	7.39137	3.37603	0.366523
LOB	LOC110633316	0.144655	0.386588	0	1.09549
	LOC110648616	0.0637977	0.0682437	7.45288	1.08983
	LOC110661113	4.14445	0.401984	1.49338	0.116303
	LOC110667349	22.4622	25.6476	8.99413	48.6657
	LOC110668385	0.475906	0.368278	2.16493	0.0256814
	LOC110673020	8.11819	11.5018	58.3842	23.5503
LUG	LOC110636203	23.1858	17.3548	8.20776	16.3961
	LOC110652503	0	1.31685	0	2.26121
	LOC110660304	16.6441	17.4446	3.9852	13.1718
MADS-MIKC	LOC110634511	99.2479	104.486	19.6985	100.169
	LOC110638897	0.013642	0	6.54362	0.485051
	LOC110639567	0	0.0159314	1.07862	0.0169405
	LOC110648474	0.896314	6.18951	20.2768	2.57799
	LOC110649374	0.504604	0.114202	10.1101	2.78405
MADS-M-type	LOC110633549	0.0156713	0.0509777	4.43304	0.507234
	LOC110634593	8.62977	15.7397	71.0179	13.1199
	LOC110644218	0.79019	1.63015	5.48346	1.18051
	LOC110648047	0.931317	0.673925	3.33352	0.131981
	LOC110664728	0.249781	0	53.9108	0.0213008
	LOC110666153	2.78173	2.64574	8.04144	3.69983
MBF1	LOC110635209	37.0816	35.4293	123.04	42.1693
	LOC110670389	86.6473	145.15	337.747	146.432
MED7	LOC110650512	10.0148	9.93401	21.2727	7.33655
MYB	LOC110635469	0.0709445	0.0142421	9.12222	0
	LOC110639684	2.85405	7.36283	7.6346	1.14477
	LOC110640256	0.800827	0.66775	0.125384	1.40649
	LOC110641011	32.8571	27.9192	14.0061	52.7291
	LOC110643836	28.8067	13.8184	0.794308	4.98613
	LOC110645813	27.8875	20.5079	5.52253	27.8702
	LOC110647116	5.50277	13.7241	2.14293	6.9077
	LOC110647266	21.42	35.0907	23.5162	99.8389
	LOC110648934	17.296	15.8087	12.8212	28.7998
	LOC110650681	4.07904	15.8814	51.9988	2.93035
	LOC110652018	0	0	1.5852	0
	LOC110653420	0	0	0.97318	0
	LOC110653544	0.924907	1.15479	0.452668	5.10404
	LOC110662524	14.1513	15.2372	5.28104	10.5539
	LOC110662525	0.311311	1.53246	0.805751	0.0166255
	LOC110663676	17.241	7.68909	4.3809	9.27961
	LOC110663754	0.0435067	0.0157753	1.38725	0
	LOC110666347	1.05095	0.132899	0.58223	4.67264
	LOC110666710	0	0	1.52497	0.0199021
	LOC110672952	0.0255776	0.29939	0.565836	0.0130077
	LOC110673859	17.0143	10.0972	3.92378	15.3849
MYB-related	LOC110643985	0.538867	0.21904	24.2834	5.09062
	LOC110652549	1.37625	1.1686	4.26277	1.29533
	LOC110655685	0.448691	0.284535	1.6937	0.325743
	LOC110658937	18.3091	14.3709	27.0597	12.9531
	LOC110660512	6.6519	6.07937	21.4331	5.26262
	LOC110661996	1.20201	1.76665	3.5987	0.393184
NF-YA	LOC110635766	6.14658	1.78785	37.4445	13.2233
	LOC110668171	12.1038	2.9223	5.95865	1.97936
	LOC110670690	11.0471	3.95775	0.270579	3.3948
	LOC110645433	26.0504	18.7453	67.1381	20.396
	LOC110658044	0.781929	2.03927	0.812258	2.39057
	LOC110661168	0.862177	2.66934	0.0387217	2.51176
	LOC110670913	76.5054	128.997	42.7676	181.008
OFP	LOC110670206	3.7466	5.26238	0.0819135	4.94649
Others	LOC110641379	7.9919	14.1749	32.8823	8.05732
	LOC110643344	28.9444	27.0865	24.7456	60.9688
	LOC110643995	6.13896	5.43531	2.11986	8.5878
	LOC110648869	0.202648	0.0553087	6.73935	1.13969
	LOC110649490	22.5446	50.3978	9.95482	31.5796
	LOC110660503	15.1617	12.0602	6.73632	17.3435
	LOC110662389	0.107338	0.048105	0.27125	5.04949
	LOC110664199	9.72411	12.9496	6.68618	14.9156
	LOC110666027	0.596837	0.635417	2.52361	0.327873
	LOC110666539	1.62853	3.20778	61.2782	11.3057
	LOC110667413	0	0	0.0385823	1.23686
	LOC110671023	0.97879	0.131183	1.58491	0.202511
PHD	LOC110637655	3.59808	3.0021	1.65032	4.09999
	LOC110650643	43.9313	131.202	22.5932	109.804
	LOC110662674	12.7354	12.738	7.12919	17.7662
PLATZ	LOC110633135	0.400561	0.240463	0.842449	0.0425446
	LOC110647286	0.289568	0.104966	0.0252931	2.68997
	LOC110650600	2.86039	3.87065	6.80736	1.12341
	LOC110651998	2.58812	3.07497	23.64	2.6669
	LOC110659847	1.33892	1.8514	0.894761	7.32168
Rcd1-like	LOC110670014	8.6377	11.543	25.0996	9.98406
S1Fa-like	LOC110640344	51.5994	50.4247	152.548	65.9564
	LOC110660114	80.017	82.3401	210.493	103.244
SBP	LOC110631502	313.574	105.242	25.1385	108.058
	LOC110632866	31.4651	7.3181	9.1261	57.6756
	LOC110638140	0.21834	0.257495	0.0375282	0.493291
	LOC110638184	6.5218	3.84725	0.299803	6.42849
	LOC110651856	20.8311	12.0238	0.588384	14.4043
	LOC110653404	7.8256	9.76111	2.80385	8.80916
	LOC110656342	22.5291	19.1782	14.8296	4.50389
	LOC110670884	12.2748	9.69456	3.77913	9.68695
SET	LOC110638606	5.73334	6.73904	2.46933	6.21016
	LOC110639467	3.8456	3.6553	1.66423	5.2041
	LOC110639486	0.295785	0.656668	0.21876	1.10907
	LOC110639494	3.47432	3.81124	1.03566	2.50954
	LOC110645389	80.6629	68.5284	29.3165	75.1325
	LOC110651906	1.02222	0.00878204	0.735306	0
	LOC110669620	2.14912	1.78693	5.95035	2.49859
SNF2	LOC110633529	6.02983	5.99289	1.59664	4.81981
	LOC110633932	3.518	3.64995	13.1106	4.23505
	LOC110637554	38.2531	36.2574	13.1508	26.9898
	LOC110645546	0.552896	0.707901	0.00677235	0.47609
	LOC110650415	8.15934	11.5844	5.19953	11.9133
	LOC110660625	9.2979	11.1211	4.73157	10.449
	LOC110664246	27.9064	27.6186	13.0031	28.6567
	LOC110665023	2.52281	2.00625	0.224048	1.56011
	LOC110673179	8.05391	10.0174	3.04607	6.26415
	LOC110673954	54.3638	57.627	16.482	40.37
SRS	LOC110644764	3.81817	12.5118	0.764271	7.75839
SWI/SNF-BAF60b	LOC110650471	1.35255	4.37377	0.946875	3.78041
	LOC110665988	2.32086	2.18694	0.0706713	1.93539
TAZ	LOC110650593	3.20572	1.72222	1.55607	0.361581
	LOC110665933	0.921811	2.00829	0.332563	1.47065
	LOC110666255	0.595837	0	2.05888	0.0305493
	LOC110666257	1.07695	1.74867	0.310217	2.05653
	LOC110671361	1.05387	0.370635	0.613467	0.115255
TCP	LOC110639704	0.0699098	0.0867002	1.20116	0.193498
	LOC110652424	2.68141	2.54759	1.63964	4.69194
	LOC110653945	83.9187	139.719	30.4013	88.0373
	LOC110654799	0.594462	0.573555	3.45877	1.40901
	LOC110667740	28.921	25.0159	7.36039	36.0075
Tify	LOC110644229	0.188456	0.675521	0.161406	2.55723
	LOC110658654	165.59	146.672	64.3054	216.926
	LOC110664720	0.0142909	0.0462538	21.7812	0.350664
TRAF	LOC110632623	9.47456	7.14849	18.5845	8.65493
	LOC110648944	1.14657	5.77269	0.042814	0.85451
Trihelix	LOC110640262	0.521185	0.487396	6.91115	0.317714
	LOC110663717	18.5229	7.88735	8.36707	28.972
	LOC110664845	18.3829	28.7515	10.0487	20.0451
TUB	LOC110631933	35.9645	46.1421	22.4428	51.3926
	LOC110638093	29.8798	23.4104	0.858704	15.6756
VOZ	LOC110633255	53.4293	62.6698	21.8815	77.8677
zf-HD	LOC110634335	7.44189	6.54533	5.70845	1.26329
	LOC110635171	1.14291	4.58752	0.452969	1.76595
	LOC110639348	16.8903	9.02119	23.1304	4.37242
	LOC110650857	0.0673536	0.126502	4.88072	0.0788794
