# Supplementary material for: Comparative analysis of latex transcriptomes reveals the potential mechanisms underlying rubber molecular weight variations between the Hevea brasiliensis clones RRIM600 and Reyan7-33–97
Source: BMC Plant Biol. 2021 May 29;21:244. doi: 10.1186/s12870-021-03022-5 (PMC8164328; doi:10.1186/s12870-021-03022-5)
Supplement: Supplementary file 7 — Table S7. Specific primers used for quantivtative real-time PCR of 17 key genes. [file 12870_2021_3022_MOESM7_ESM.xlsx]

## Sheet: Table S7
Comparative analysis of latex transcriptomes reveals the potential mechanisms underlying the rubber molecular weight variations among Hevea brasiliensis clones RRIM600 and Reyan7-33-97 Shichao Xin, Yuwei Hua, Ji Li, Xuemei Dai, Xianfeng Yang, Jinu Udayabhanu, Huasun Huang* and Tiandai Huang*
Table S7. Specific primers used for quantivtative real-time PCR of 17 key genes.
Description	Gene name	Gene ID	Forward (5'-3')	Reverse (5'-3')
qRT-PCR	HbRH8	LOC110669478	TCACAGGGTTGGTAGATCAG	CCAAGCTCTTGCTCAATCC
	ACAT1	LOC110641512	GGGAAGGGGAAAACCTTTGA	GTATAGCCAATGCTGGAGAAG
	HMGS2	LOC110654798	GCAGCCATTGCGATTTTAG	CATGAGGTAGCATGTTTGGGA
	HMGR2	LOC110669274	TTTTGATACCTTGGCCGTAG	ATGTTCATCCCCATTGCATC
	HMGR3	LOC110639682	TGACGACCGATCTCCATCA	TCGTTAAGTTCCCACACGTC
	DXS6	LOC110655489	AGCACCAAGATCAAACCTCT	TCATCAGGTGTGCTGAAC
	DXS7	LOC110654072	GATTTTCAAGAATTGCTGCCA	AGCCAGCTCTTTCAGTTCC
	GPPS1	LOC110661947	CTATGGTATCTGGCTGCGTT	TGCATGAGAACCTAACACGG
	FPS2	LOC110658887	TGGTCGTGAAGGCTTTAGAA	CCGTAAATACCCCCTGAAGC
	CPT6	LOC110667932	TCAAGACCGCAGCAGATAAG	TCTCCGTTTCCATCGTTGC
	REF4	LOC110644927	ACAGTTTATGCCAGGGCTTC	ATGCCTGCTTGACAATTGGA
	REF5	LOC110644913	TTTGGACTTTGTGCAAACGG	CAACCTGCAACTTGTGATCT
	SRPP8	LOC110644922	GTTACGGTTAAGAGCGTGGT	AGAGGCACTTGACATCACAC
	SRPP9	LOC110644920	GAAGCCGTAGCTGATCTCTC	CGTTGAGCTTTGAGAGGGAA
	CPTL	LOC110649060	TCCGTTTGCGCAGATTAGTTA	CACACCCATATCTTCCACCC
	eIF2d	LOC110646578	CCCTCCCAAAGCTGAGATAAC	TTCAGGGACCTTCCAGAGAG
	eIF5a	LOC110635680	CCATCCGCAAAAACGGTTAC	CCAACGAAATGGCACTTAGC
